# Supplementary material for: Finding least-cost net-zero CO 2e strategies for the European cement industry using geospatial techno-economic modelling
Source: Royal Society of Chemistry journal article supplement (doi:10.1039/d4su00373j), 2024-01-01
Supplement: d4su00373j1.pdf [file d4su00373j1.pdf]

# Supplementary Information - Finding least-cost net-zero CO<sub>2e</sub> strategies for the European cement industry using geospatial techno-economic model- ling

Till Strunge,<sup>1,2,3,5\*</sup> Lukas Küng<sup>1</sup>, Nixon Sunny<sup>4</sup>, Nilay Shah<sup>4</sup>, Phil Renforth,<sup>1</sup> and Mijndert Van der Spek<sup>1,5\*\*</sup>

<sup>1</sup>Research Centre for Carbon Solutions, School of Engineering and Physical Sciences, Heriot-Watt University, Edinburgh, United Kingdom

<sup>2</sup>Research Institute for Sustainability — Helmholtz Centre Potsdam (Formerly Institute for Advanced Sustainability Studies, IASS), Berlin, Germany

<sup>3</sup>Department of Civil Engineering, Technische Universität Berlin, Berlin, Germany

<sup>4</sup>Department of Chemical Engineering, Imperial College London, London, United Kingdom

<sup>5</sup>Lead Contact

\*Correspondence: T.strunge@tu-berlin.de

\*\*Correspondence: M.Van\_der\_Spek@hw.ac.uk

## TABLE OF CONTENT

|                                                                                                                           |    |
|---------------------------------------------------------------------------------------------------------------------------|----|
| SUPPLEMENTARY NOTES .....                                                                                                 | 3  |
| Note S1: Biofuels .....                                                                                                   | 3  |
| Note S2 Carbon capture and storage .....                                                                                  | 3  |
| Note S3: CO <sub>2</sub> mineralisation.....                                                                              | 3  |
| Note S4: Calcined clay cements.....                                                                                       | 4  |
| Note S5: Direct air capture and storage.....                                                                              | 4  |
| Note S6: Selection of Storage locations and other grid point locations.....                                               | 4  |
| SUPPLEMENTARY FIGURES .....                                                                                               | 5  |
| Figure S1: Flowchart techno-economic model.....                                                                           | 5  |
| Figure S2: Flowchart of bulk transport model. ....                                                                        | 5  |
| Figure S3: Flowchart of MIP model. ....                                                                                   | 6  |
| Figure S4: Flowchart of post-processing model. ....                                                                       | 6  |
| Figure S5: Depiction of case study regions.....                                                                           | 7  |
| Figure S6: Bulk transport routes for the bulk feedstocks.....                                                             | 7  |
| Figure S7: Comparison of calculated levelised costs of cement.....                                                        | 8  |
| Figure S8: Comparison of calculated carbon footprint of cement.....                                                       | 8  |
| Figure S9: Comparison of calculated added costs of cement by location.....                                                | 9  |
| Figure S10: Depiction of transport networks.....                                                                          | 10 |
| SUPPLEMENTARY TABLES.....                                                                                                 | 11 |
| Table S1: Comparison of different demand and supplies for different fuels in the European cement industry. ....           | 11 |
| Table S2: Overview of suggested measures to reach CO <sub>2</sub> neutrality in the cement industry with references. .... | 12 |
| Table S3: Description of grid point types.....                                                                            | 12 |
| Table S4 : Estimated pipeline sizes for currently planned pipeline projects.....                                          | 12 |
| Table S5: Defined ranges for feedstock costs.....                                                                         | 13 |
| Table S6: General assumptions.....                                                                                        | 13 |
| Table S7: Factors used for TCR calculation.....                                                                           | 14 |
| Table S7: Factors used for OPEX calculations.....                                                                         | 14 |
| Table S8: Process assumptions.....                                                                                        | 14 |
| Table S9: Assumptions carbon footprint reduction assessment.....                                                          | 15 |
| Table S10: Summary of costs for each cement intervention.....                                                             | 15 |

|                                                                                                                                            |    |
|--------------------------------------------------------------------------------------------------------------------------------------------|----|
| Table S11: Summary of costs for Direct Air Capture plants. ....                                                                            | 16 |
| Table S12: Summary of costs for CO <sub>2</sub> Transport .....                                                                            | 17 |
| Table S13: Changes in OPEX <sub>variable</sub> for different feedstock and fuel price scenarios .....                                      | 17 |
| Table S14: Breakdown of costs for baseline cement plant. ....                                                                              | 17 |
| Table S15: Breakdown of costs for cement plant with CCS. ....                                                                              | 18 |
| Table S16: Breakdown of costs for cement plant with biofuel .....                                                                          | 18 |
| Table S17: Breakdown of costs for cement plant with CCS, biofuel.....                                                                      | 18 |
| Table S18: Breakdown of costs for cement plant with .....                                                                                  | 19 |
| Table S19: Breakdown of costs for cement plant with CO <sub>2</sub> mineralisation, biofuel .....                                          | 20 |
| Table S20: Breakdown of costs for cement plant with CO <sub>2</sub> mineralisation, CCS.....                                               | 21 |
| Table S21: Breakdown of costs for cement plant with CO <sub>2</sub> mineralisation, biofuel, CCS.....                                      | 21 |
| Table S22: Breakdown of costs for cement plant with calcined clay. ....                                                                    | 22 |
| Table S23: Breakdown of costs for cement plant with calcined clay, biofuel. ....                                                           | 23 |
| Table S24: Breakdown of costs for cement plant with calcined clay, CCS .....                                                               | 23 |
| Table S25: Breakdown of costs for cement plant with calcined clay, biofuel, CCS. ....                                                      | 24 |
| Table S26: Results of non-collaborative analysis.....                                                                                      | 25 |
| Table S27: Results Sensitivity Analysis: selected interventions for cement plants in United Kingdom and Ireland. ....                      | 27 |
| Table S28: Results Sensitivity Analysis: selected interventions for cement plants in United Kingdom and Ireland without calcined clay..... | 27 |
| Table S29: Results Sensitivity Analysis: selected interventions for cement plants in Germany. ....                                         | 27 |
| Table S30: Results Sensitivity Analysis: selected interventions for cement plants in Germany without calcined clay. ...                    | 28 |
| Table S31: Results Sensitivity Analysis: selected interventions for cement plants in Portugal and Spain. ....                              | 28 |
| Table S32: Results Sensitivity Analysis: selected interventions for cement plants in Portugal and Spain without calcined clay. ....        | 29 |
| Table S33: List of all considered grid points. ....                                                                                        | 29 |
| SUPPLEMENTARY REFERENCES .....                                                                                                             | 35 |

## SUPPLEMENTARY NOTES

### Note S1: Biofuels

The use of alternative to fossil fuels in the cement industry has been introduced over five decades ago with the European cement industry currently deriving approximately 52 % of their heating demand from alternative fuels<sup>1</sup>. While these measures were introduced gradually to reduce emissions or as cost reduction measures, they carry the caveat, that the majority of alternative fuels currently being waste and industrial by-products in gaseous (e.g., landfill gas, pyrolysis gas), liquid (e.g., pasty wastes, solvents, waste oils, greases) or solid (e.g., animal powder, bark, paper, tyres, rubber wastes, plastics, fluff) form<sup>2</sup>. As the vast majority of these industrial wastes (84%<sup>3</sup>) contain fossil carbon (e.g., waste oils are often derived from crude oil) they cannot reduce the cement industry's emissions significantly because fossil carbon will be released as CO<sub>2</sub> during combustion. Thus, the use of biofuels (e.g., wood pallets) has been suggested to reduce the energy-related emissions (approx. 40% of cement CO<sub>2e</sub> emissions)<sup>4</sup>. A review of biomass availability alongside the availability of sewage sludge and waste tyres (which could partially be produced from biogenic carbon) revealed most European countries will not have enough biomass production capacity to be used in the cement industry except for some Nordic countries (Table S1) and wastes such as sludge could only be used as partial replacements for the energy needs. Hence, for deep decarbonisation of energy-related emissions biomass would have to be used which would have to be acquired outside of Europe with the primary import considered locations being in North America<sup>5</sup>. In this study we consider wood pellets from Canada as one of the means to decarbonize the cement industry.

### Note S2 Carbon capture and storage

Carbon capture and storage has emerged among critical technologies in the cement industry's journey towards achieving net-zero emissions. Here, a multitude of different capture technologies have been suggested (i.e., monoethanolamine (MEA) capture, oxyfuel combustion capture and calcium looping)<sup>6</sup> to capture the CO<sub>2</sub> directly from flue gas which then is liquefied and transported via truck, train, ship, or pipeline to geological storage sites<sup>7-9</sup>. Previous studies have found pipeline transport to be most economical while simultaneously the lowest emissions<sup>10</sup>. CCS concepts often face acceptance issues from laypeople due to concerns about risks such as induction of earthquakes. Thus, offshore CO<sub>2</sub> storage should be chosen over onshore storage concepts (e.g., larger distances lead to lower risk perception)<sup>11</sup>. In this study we consider MEA capture, pipeline transport and offshore CO<sub>2</sub> storage as one of the strategies to decarbonize the cement industry.

### Note S3: CO<sub>2</sub> mineralisation

Carbon dioxide (CO<sub>2</sub>) mineralisation pathways have gained significant attention as promising avenues within the realm of Carbon Capture and Utilization (CCU) technologies<sup>12,13</sup>. In CO<sub>2</sub> mineralisation approaches, captured CO<sub>2</sub> is reacted with minerals to form stable carbonates (e.g., MgCO<sub>3</sub>, CaCO<sub>3</sub>). A multitude of feedstocks has been suggested for CO<sub>2</sub> mineralisation among them are secondary feedstocks (e.g., steel slag, waste incineration ash, coal fly ash) containing alkaline earth metals oxides (e.g., CaO, MgO, FeO)<sup>14,15</sup> or primary feedstock such as rocks containing magnesium- or calcium-rich silicate minerals<sup>12,16,17</sup>. As primary feedstock for instance, minerals like forsterite (Mg<sub>2</sub>SiO<sub>4</sub>) found in olivine-bearing rocks, lizardite (Mg<sub>3</sub>Si<sub>2</sub>O<sub>5</sub>(OH)<sub>4</sub>) present in serpentine-bearing rocks, and wollastonite (CaSiO<sub>3</sub>) have been highlighted. The composition of rocks can vary significantly, containing anywhere between 50% to 100% of these minerals, contingent upon the geological makeup of the extraction site<sup>17,18</sup>. Equations 1 to 3 delineate the fundamental CO<sub>2</sub> mineralisation reactions applicable to these aforementioned minerals<sup>19</sup> (Eq. 1 to Eq. 3).

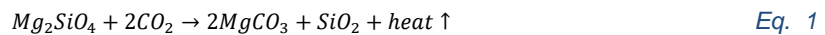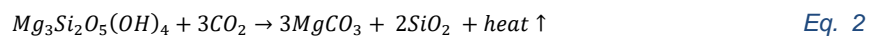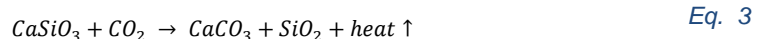

The by-product silica (SiO<sub>2</sub>) resulting from mineralisation reactions using the aforementioned primary feedstocks has an amorphous structure<sup>18,20,21</sup>. Amorphous silica is a well-established pozzolanic additive in cement blends. It reacts with calcium hydroxide CaOH in cement, generating supplementary binding compounds (such as calcium silicate hydrates) that enhance the strength of the cement, either matching or surpassing the strength achieved solely by cement usage<sup>22,23</sup>. Hence, the products can be used as cement replacements (supplementary cementitious materials, SCMs)<sup>20,24</sup>. We previously showed that emission reductions of up to 33% compared to conventional ordinary Portland cement can be achieved using CO<sub>2</sub> mineralisation for SCM production. But for favourable economics the transport must be limited<sup>19</sup> (e.g., in Europe, olivine-bearing rocks can be found only in Norway, Italy, Greece or Spain<sup>18</sup>).

We here selected a direct aqueous CO<sub>2</sub> mineralisation approach based on Eikeland, *et al.*<sup>25</sup>, Ostovari, *et al.*<sup>26</sup> and Kremer and Wotruba<sup>27</sup> which we further developed in Strunge, *et al.*<sup>19</sup> to produce suitable SCMs for cement production. We only consider olivine-bearing rocks as feedstocks as they are available in multiple regions in Europe, do not require heat treatment and subsequently showed the best economic potential<sup>19</sup>.

**Note S4: Calcined clay cements**

Commonly the cement industry used SCMs containing amorphous silica which reacts with calcium hydroxide in cement allowing to decrease clinker content and thus reduce emissions. In recent years interest has been growing to use clays (in particular kaolinite ( $Al_2[(OH)_4Si_2O_5]$ ) clays) which not only contain comparably high concentrations of silica, but also Aluminium oxide (alumina,  $Al_2O_3$ ), which become reactive in cement blends after calcination (600- 800 °C)<sup>28</sup>. Here, in cement blends limestone reacting with alumina in the presence of calcium hydroxide exhibits amplified reactions in the company of additional alumina from calcined clays<sup>29,30</sup>. This interaction yields carboaluminate hydrates, filling pore spaces and enhancing the strength of the mortar (Eq. 4).

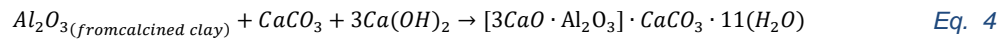

Hence, cement blends comprising of limestone, calcined clay, and clinker, referred to as LC<sub>3</sub> (Limestone Calcined Clay Cement), have been demonstrated<sup>31</sup> and suggested as a strategy to significantly reduce emissions of the cement industry (due to clinker replacement and low calcination temperature of clays)<sup>28,32,33</sup>. Previous studies suggest emission reductions of approximately 30% contingent on technology maturity and transport distance of feedstocks could be achieved using LC<sub>3</sub> blends<sup>28</sup>.

We here consider the use of calcined clays in LC<sub>3</sub> cements as one potential intervention as means for emission reduction in the cement industry using kaolinite clays as feedstock.

**Note S5: Direct air capture and storage**

Removing CO<sub>2</sub> from the air will become imperative during the upcoming decades. On the one hand, hard to abate sectors might still be responsible for 1.5 to 3.1 G t<sup>-1</sup>CO<sub>2eq</sub> of greenhouse gas (GHG) emissions which will have to be captured to reach GHG net neutrality<sup>34</sup>. Moreover, climate models suggest the need for net-negative CO<sub>2</sub> emissions in the next decades<sup>35</sup>. This can be achieved using carbon dioxide removal (CDR) technologies, which are concepts in which CO<sub>2</sub> is captured from the atmosphere and then stored permanently<sup>36</sup>. As NETs are a multitude of different concepts currently suggested including enhanced weathering, ocean alkalinity projects or afforestation. The most prevalent technology currently discussed (mainly due to high accountability of captured and stored CO<sub>2</sub>) are direct air capture (DAC) and direct air capture and storage (DACS) technologies<sup>37</sup>.

DAC technologies can be built remotely to capture CO<sub>2</sub> from the atmosphere using solid sorbents or liquid solvents (e.g., MgO, KOH solutions) to temporarily capture CO<sub>2</sub>. After immobilisation of CO<sub>2</sub> for example in K<sub>2</sub>CO<sub>3</sub>, energy in form of low-grade heat or electricity is used to regenerate the solvent/sorbent and release CO<sub>2</sub> which then is liquified. In DACS concepts the CO<sub>2</sub> is then transported to geological storage sites where it is stored underground (e.g., in aquifers)<sup>37,38</sup>.

For this study we consider direct air capture via liquid sorbents based on an assessment from Young, *et al.*<sup>37</sup>, which has to be connected to a CO<sub>2</sub> storage site via pipeline and can be used to decarbonise the cement industry.

**Note S6: Selection of Storage locations and other grid point locations.**

**CO<sub>2</sub> storage locations.** Currently not all storage sites in Europe have been investigated and there are regional differences in the depth of research conducted to determine suitable storage sites. Currently, sites that have been determined have been determined through modelling and theoretical work. Only few field tests for CO<sub>2</sub> injections have been conducted to this day. For potential injection sites in the North Sea and the Irish Sea used in the UK&IRE case study we used data from European Commission - Joint Research Centre<sup>39</sup> which were published a decade ago and to this day provides the most comprehensive survey of potential storage sites within Europe. The data provided us with a storage site location as well as the mean capacity. We here assume an injection plant lifetime of 30 years (Table S6: General assumptions) to calculate annual storage capacity. We used the same dataset<sup>39</sup> to determine CO<sub>2</sub> storage sites in the Atlantic for the PT&ESP case study. For Spain the dataset only offered potential onshore storage sites, which we here consider out of scope and thus did not include in the analysis. For Germany the dataset<sup>39</sup> was incomplete. We hence used the provided geographic data of potential storage areas and manually placed potential injection locations in each presented suitable rock formation providing us with 19 storage sites in German North Sea. Due to lack of information for storage in the German North Sea, we used the estimation of Knopf and May<sup>40</sup> which estimated a mean offshore storage capacity for Germany of 9.5Gt, leading to 500Mt per storage site. While these uniformly distributed storage capacities are likely to be overestimated for most storage sites a study of Höller and Viebahn<sup>41</sup> concluded that at least 13 offshore storage sites in Germany could have a capacity larger than 100Mt. For the Germany case study we additionally added storage sites and capacities from Netherland's North Sea territories, which we derived from Neele, *et al.*<sup>42</sup>.

**Terminal locations.** To connect onshore and offshore pipelines, we here define Terminal locations. To reduce computational efforts (increase number of potential options), we selected a few terminal locations for each case study. For Germany and the United Kingdom & Ireland, we selected terminals based on existing natural gas pipeline terminal locations in these countries taken from European Commission<sup>43</sup>. For the Portugal and Spain we assigned terminal locations based on harbour locations as currently no natural gas pipeline into the Atlantic ocean exist<sup>43</sup>.

**Feedstock locations.** We used potential kaolinite clay sites from Dill<sup>44</sup> who reviewed mineral deposits in central Europe. To this dataset we added data from Galán, *et al.*<sup>45</sup> and British Geological Survey<sup>46</sup> for Spain and England respectively. For olivine-bearing rocks locations we used data from Kremer, *et al.*<sup>18</sup> who mapped active olivine-bearing rock locations in Europe. We must acknowledge that there might be more potential feedstock locations both for all feedstock which first must be developed / investigated<sup>47</sup>.

**Harbour locations and transport route data.** The transport model uses shapefiles of European railways obtained from Mapcruzin<sup>48</sup>, offshore shipping routes based on automatic identification system data obtained from NCEAS<sup>49</sup> and ports taken from Novikov Novikov<sup>50</sup>.

SUPPLEMENTARY FIGURES

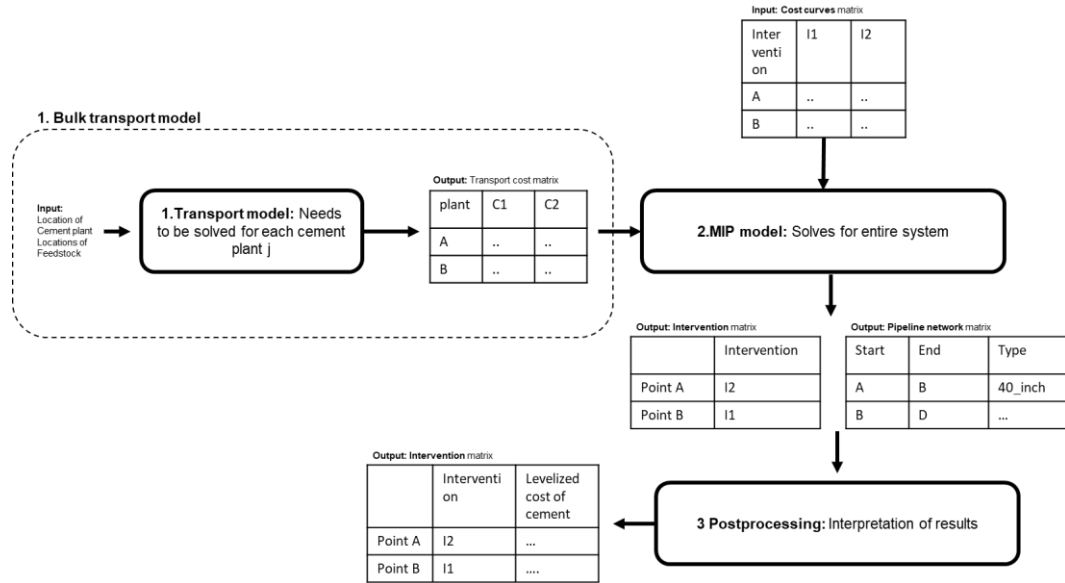

Figure S1: Flowchart techno-economic model.

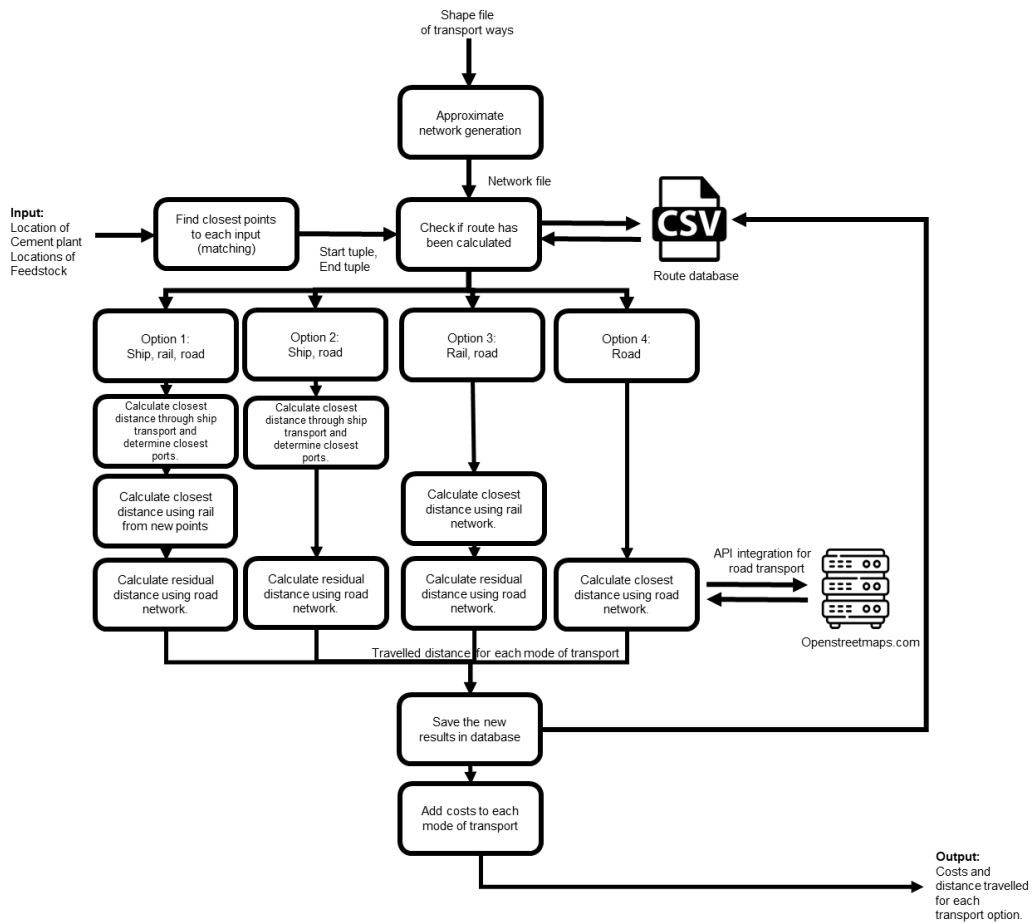

Figure S2: Flowchart of bulk transport model. Previously published in Strunge, et al.<sup>51</sup>.

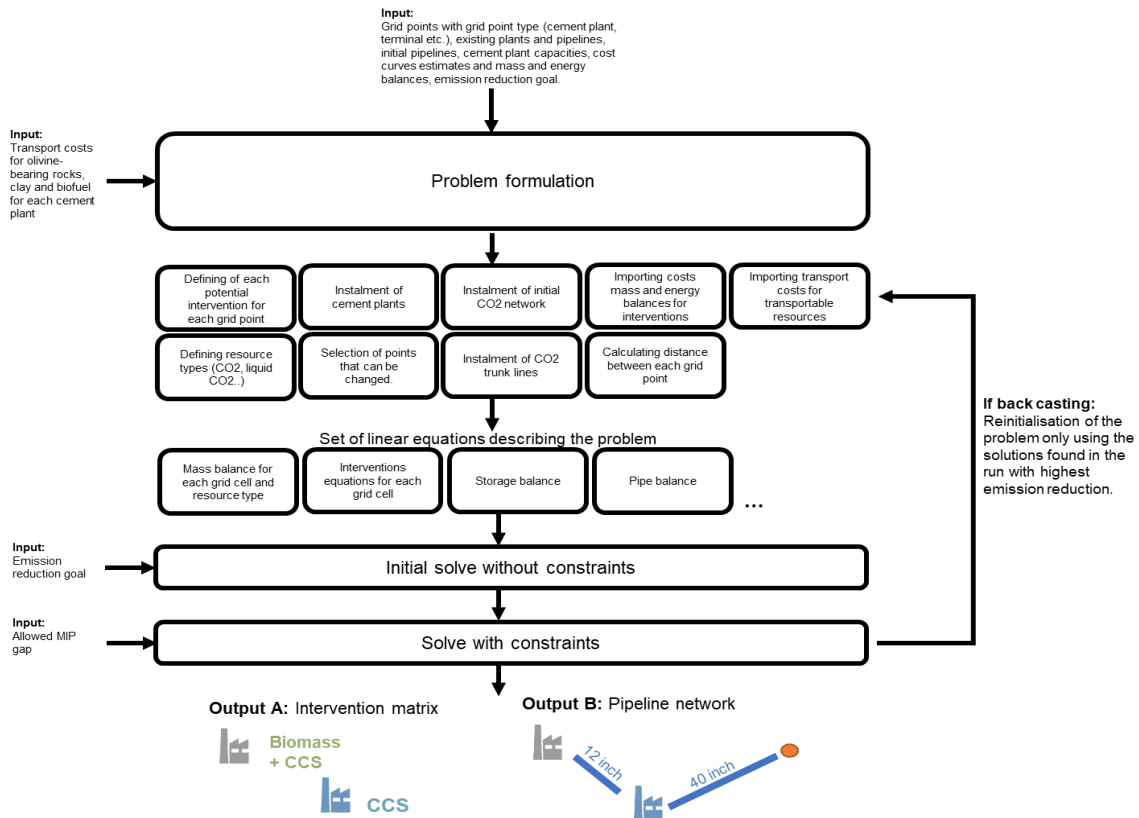

Figure S3: Flowchart of MIP model.

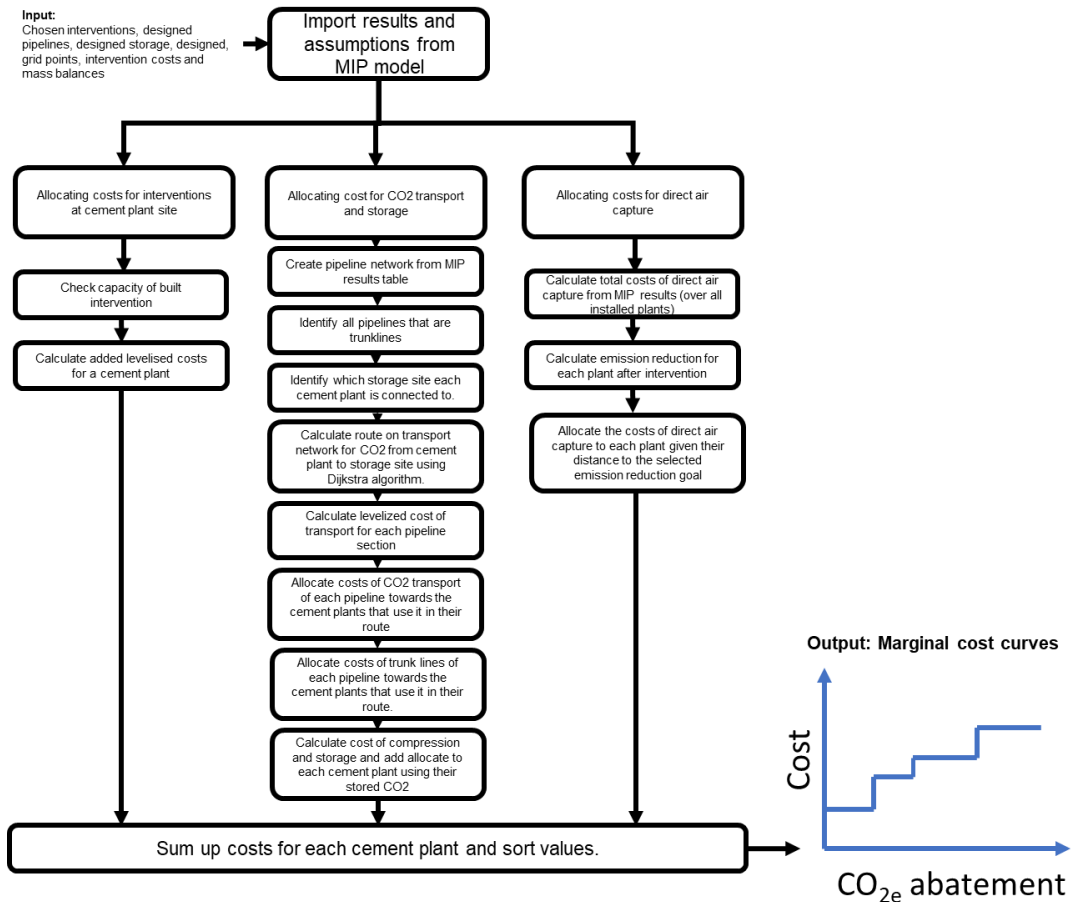

Figure S4: Flowchart of post-processing model.

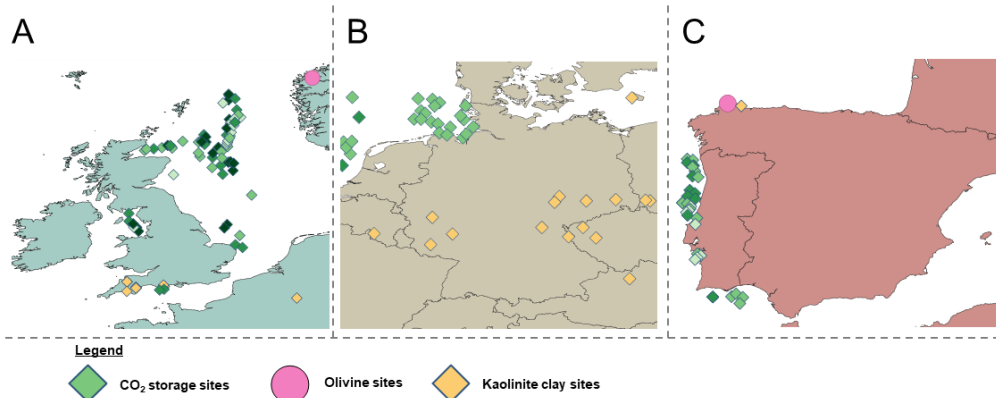

**Figure S5: Depiction of case study regions A) UK and Ireland, B) Germany and C) Portugal and Spain with relevant resource locations.**

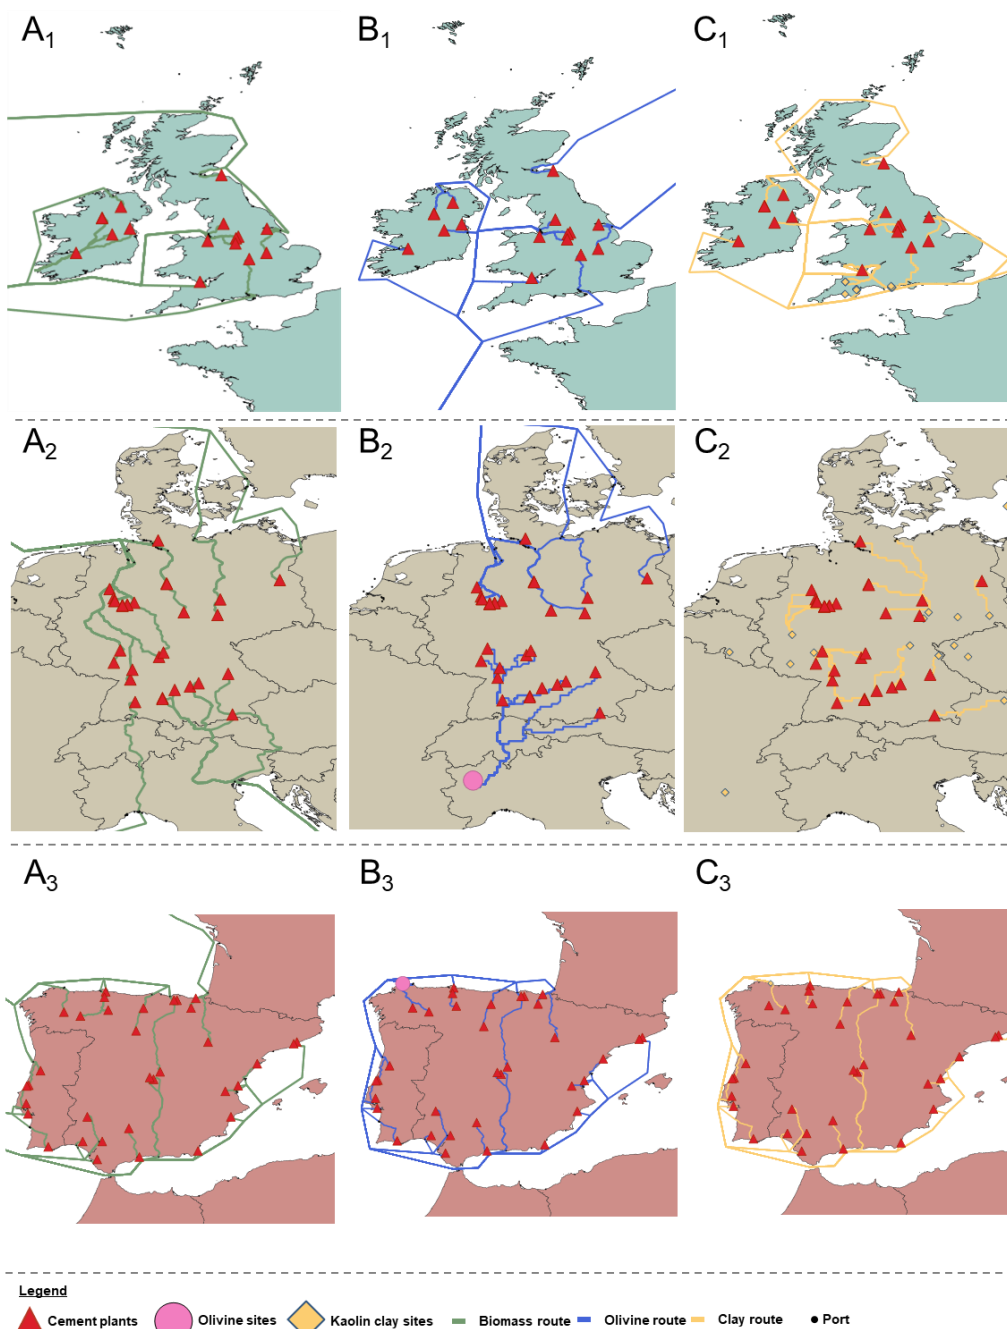

**Figure S6: Bulk transport routes for the bulk feedstocks a) biofuel, b) olivine-bearing rocks and c) kaolinite clay in 1) United Kingdom and Ireland, 2) Germany and 3) Portugal and Spain.**

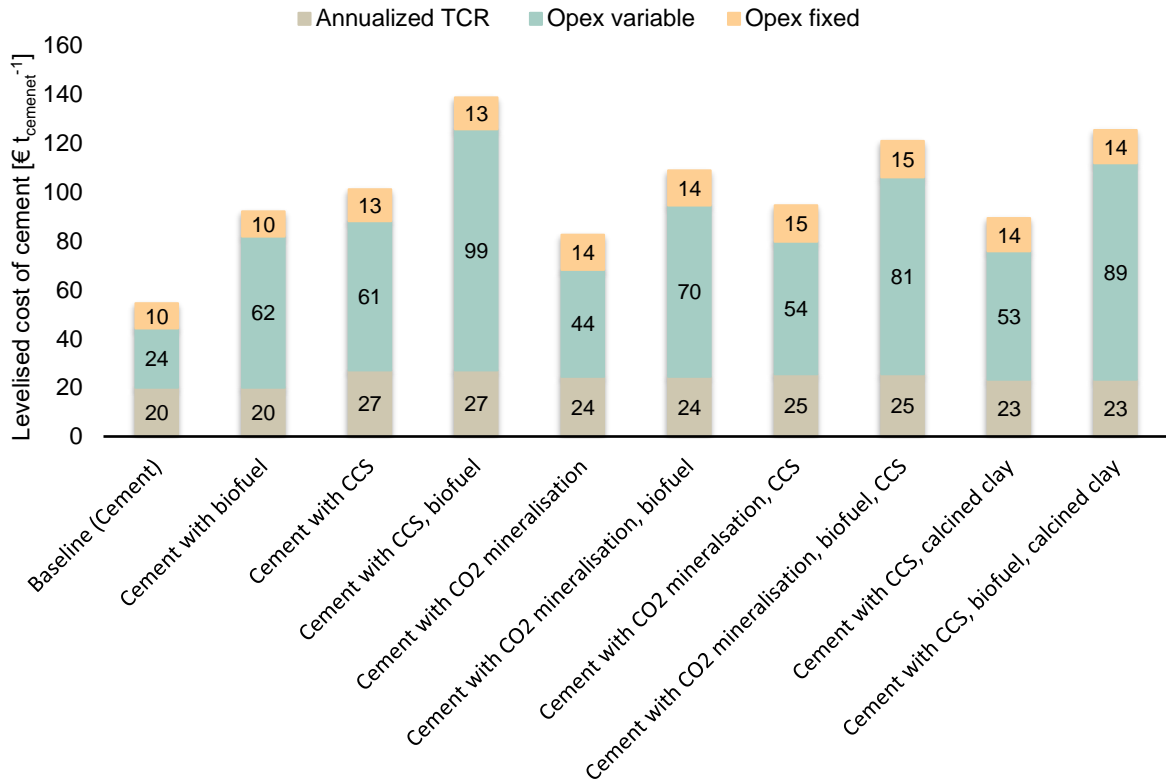

**Figure S7: Comparison of calculated levelised costs of cement for the baseline (an average European cement plant) and with introducing interventions, excluding transport of feedstocks, CO<sub>2</sub> transport infrastructure or CO<sub>2</sub> storage. Here, ordinary Portland cement (OPC) with a clinker factor of 1 is considered.**

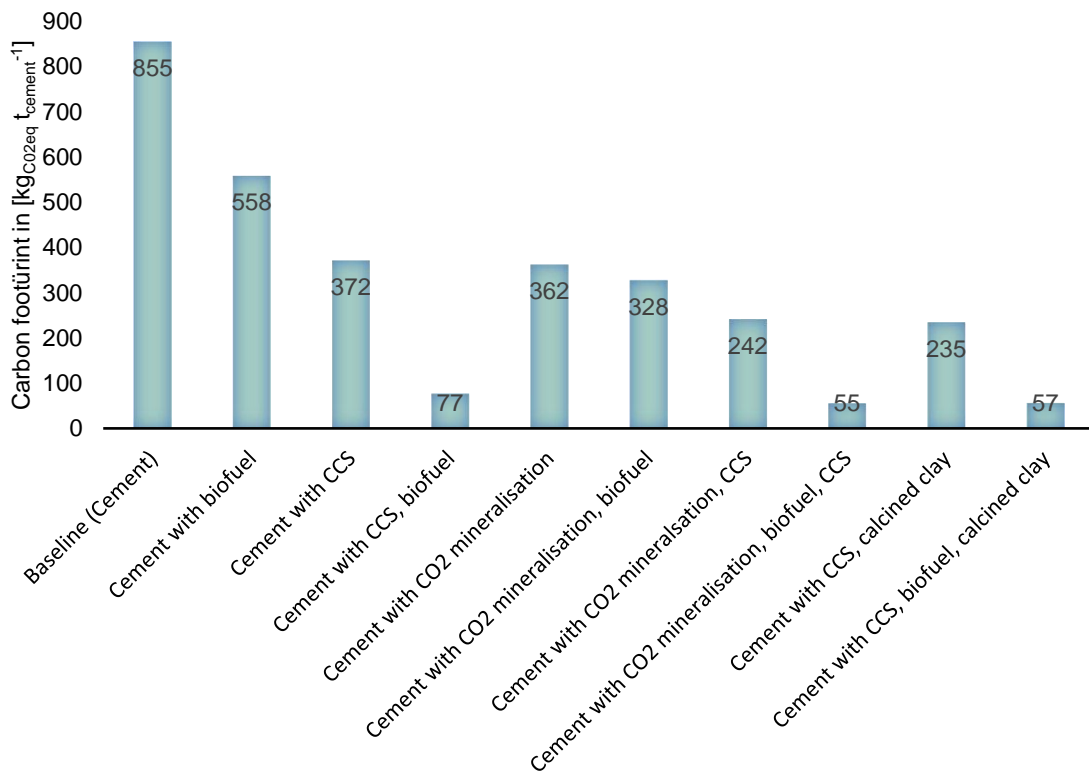

**Figure S8: Comparison of calculated carbon footprint of cement for the baseline (an average European cement plant) and with introducing interventions excluding transport of feedstocks, CO<sub>2</sub> transport infrastructure or CO<sub>2</sub> storage. Here, ordinary Portland cement (OPC) with a clinker factor of 1 is considered.**



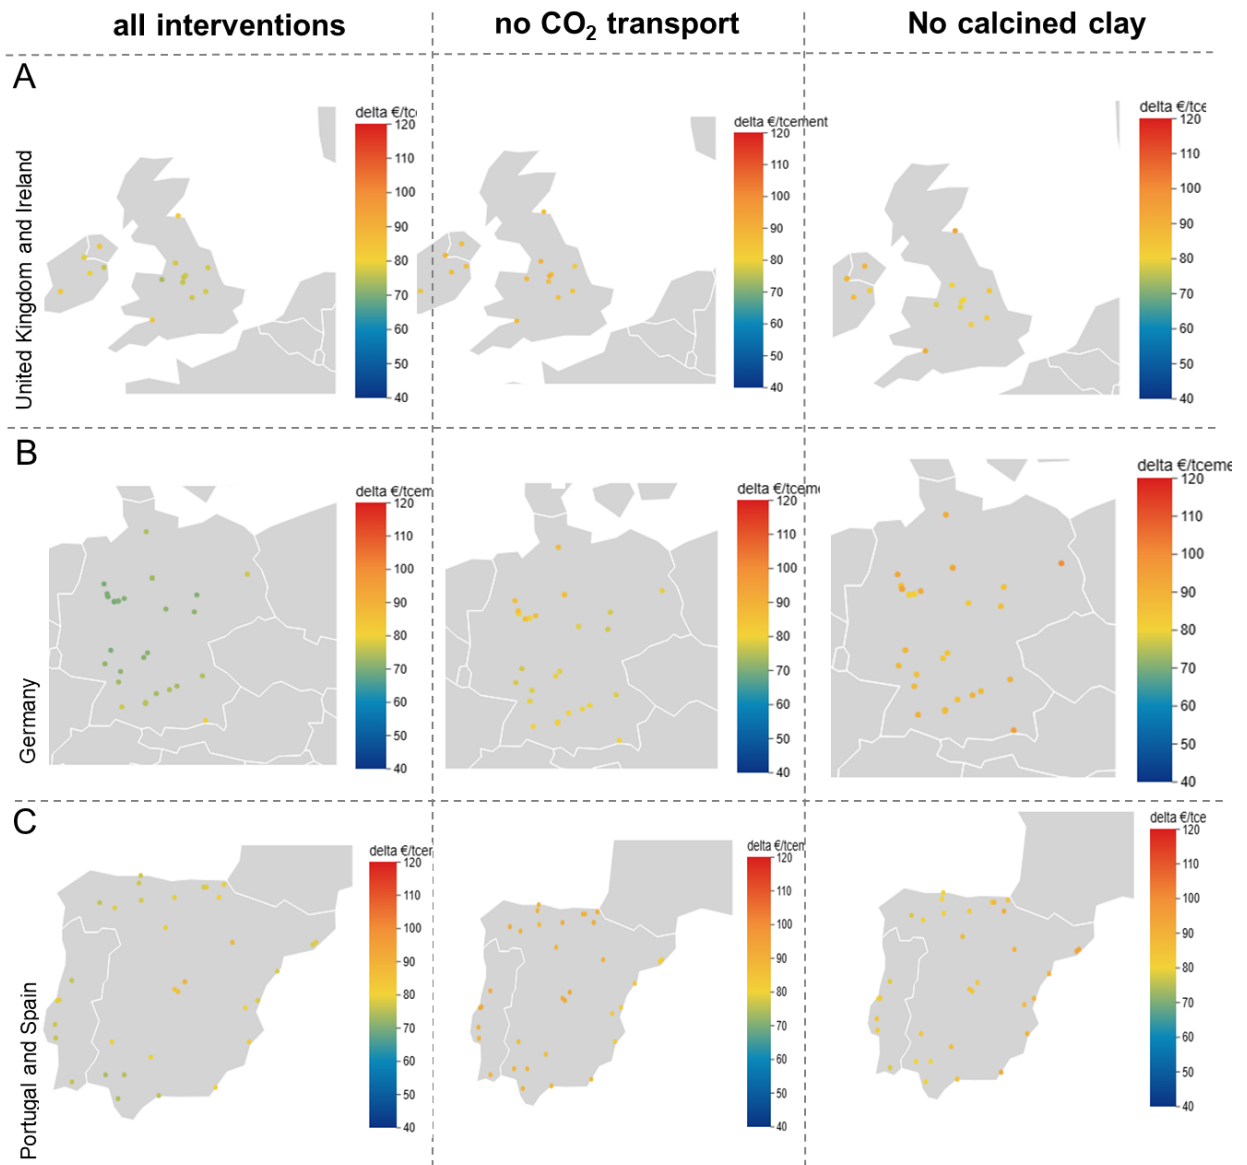

**Figure S9: Comparison of calculated added costs of cement by location for cement plants in United Kingdom and Ireland (A), Germany (B) and Portugal and Spain (C).**

A

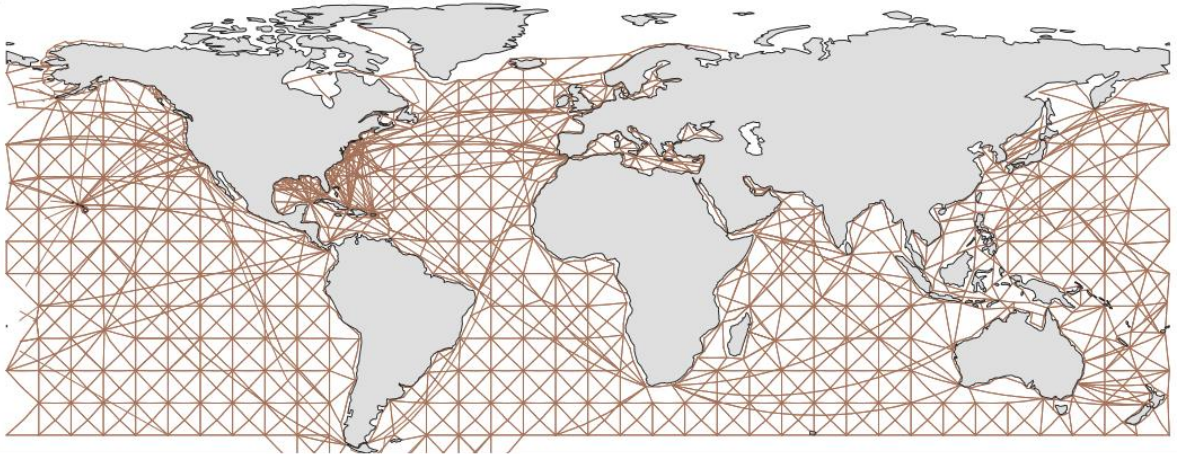

B

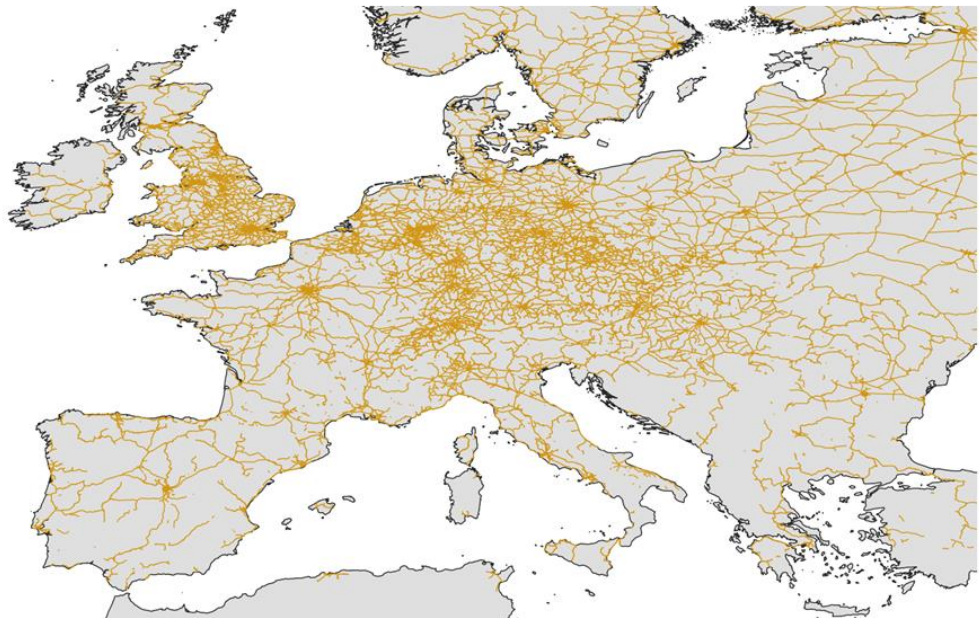

**Figure S10: Depiction of transport networks. (A) Ship transport networks, (B) Railway networks.**

SUPPLEMENTARY TABLES

**Table S1: Comparison of different demand and supplies for different fuels in the European cement industry. Underlined values show regions where a potential supply would be higher than the potential supply.**

|                             | Heating demand for cement production in [TJ a <sup>-1</sup> ]* | Potential demand for different heating sources |                                    |                                    |                                   | Supply for different heating sources                     |                                                  |                                                  |                                                 |
|-----------------------------|----------------------------------------------------------------|------------------------------------------------|------------------------------------|------------------------------------|-----------------------------------|----------------------------------------------------------|--------------------------------------------------|--------------------------------------------------|-------------------------------------------------|
|                             |                                                                | Coal [Mt a <sup>-1</sup> ]                     | Wood pellets [Mt a <sup>-1</sup> ] | Dried sludge [Mt a <sup>-1</sup> ] | Waste tyres [Mt a <sup>-1</sup> ] | Coal [Mt a <sup>-1</sup> ] <sup>**</sup> , <sup>52</sup> | Wood pellets [Mt a <sup>-1</sup> ] <sup>**</sup> | Dried sludge [Mt a <sup>-1</sup> ] <sup>**</sup> | Waste tyres [Mt a <sup>-1</sup> ] <sup>**</sup> |
| Germany                     | 81929                                                          | 3.0                                            | 4.98                               | 8.2                                | 2.7                               | <u>189.5</u>                                             | 1.70                                             | 1.92                                             | 0.14                                            |
| United Kingdom              | 18577                                                          | 0.7                                            | 1.13                               | 1.9                                | 0.6                               | <u>18.1</u>                                              | 0.13                                             | no data                                          | 0.00                                            |
| Turkey                      | 166926                                                         | 6.2                                            | 10.15                              | 16.7                               | 5.5                               | <u>76.9</u>                                              | 0.00                                             | no data                                          | 0.07                                            |
| Italy                       | 45757                                                          | 1.7                                            | 2.78                               | 4.6                                | 1.5                               | 0.1                                                      | 0.00                                             | no data                                          | 0.17                                            |
| Poland                      | 43980                                                          | 1.6                                            | 2.67                               | 4.4                                | 1.4                               | <u>130.5</u>                                             | 0.66                                             | 0.77                                             | 0.08                                            |
| France                      | 39250                                                          | 1.5                                            | 2.39                               | 3.9                                | 1.3                               | no data                                                  | 0.46                                             | 1.34                                             | 0.22                                            |
| Spain                       | 37327                                                          | 1.4                                            | 2.27                               | 3.7                                | 1.2                               | <u>10.2</u>                                              | 0.15                                             | 1.26                                             | 0.08                                            |
| Romania                     | 24333                                                          | 0.9                                            | 1.48                               | 2.4                                | 0.8                               | <u>35.2</u>                                              | 0.00                                             | 0.27                                             | 0.05                                            |
| Belgium                     | 15700                                                          | 0.6                                            | 0.95                               | 1.6                                | 0.5                               | no data                                                  | 0.54                                             | 0.21                                             | 0.00                                            |
| Croatia                     | 12596                                                          | 0.5                                            | 0.77                               | 1.3                                | 0.4                               | no data                                                  | 0.00                                             | no data                                          | 0.00                                            |
| Greece                      | 12172                                                          | 0.5                                            | 0.74                               | 1.2                                | 0.4                               | <u>65.7</u>                                              | 0.00                                             | 0.15                                             | 0.01                                            |
| Czech Republic              | 10421                                                          | 0.4                                            | 0.63                               | 1.0                                | 0.3                               | <u>57.9</u>                                              | 0.04                                             | 0.29                                             | 0.03                                            |
| Austria                     | 10409                                                          | 0.4                                            | 0.63                               | 1.0                                | 0.3                               | no data                                                  | <u>8.50</u>                                      | 0.31                                             | 0.03                                            |
| Portugal                    | 10386                                                          | 0.4                                            | 0.63                               | 1.0                                | 0.3                               | no data                                                  | 0.50                                             | 0.46                                             | 0.03                                            |
| Switzerland                 | 9582                                                           | 0.4                                            | 0.58                               | 1.0                                | 0.3                               | no data                                                  | 0.00                                             | no data                                          | 0.05                                            |
| Slovakia                    | 9401                                                           | 0.3                                            | 0.57                               | 0.9                                | 0.3                               | <u>4.0</u>                                               | 0.00                                             | 0.10                                             | 0.00                                            |
| Sweden                      | 5807                                                           | 0.2                                            | 0.35                               | 0.6                                | 0.2                               | no data                                                  | <u>1.65</u>                                      | 0.26                                             | 0.07                                            |
| Denmark                     | 5767                                                           | 0.2                                            | 0.35                               | 0.6                                | 0.2                               | no data                                                  | 0.14                                             | 0.16                                             | 0.00                                            |
| Serbia                      | 5458                                                           | 0.2                                            | 0.33                               | 0.5                                | 0.2                               | <u>40.7</u>                                              | 0.00                                             | no data                                          | 0.01                                            |
| Bulgaria                    | 5022                                                           | 0.2                                            | 0.31                               | 0.5                                | 0.2                               | <u>37.2</u>                                              | 0.00                                             | 0.09                                             | 0.00                                            |
| Netherlands                 | 4946                                                           | 0.2                                            | 0.30                               | 0.5                                | 0.2                               | no data                                                  | 0.80                                             | 0.37                                             | 0.01                                            |
| Ireland                     | 4156                                                           | 0.2                                            | 0.25                               | 0.4                                | 0.1                               | no data                                                  | 0.00                                             | no data                                          | 0.00                                            |
| Norway                      | 4010                                                           | 0.1                                            | 0.24                               | 0.4                                | 0.1                               | <u>3.4</u>                                               | 0.00                                             | no data                                          | 0.05                                            |
| Cyprus                      | 3455                                                           | 0.1                                            | 0.21                               | 0.3                                | 0.1                               | no data                                                  | 0.00                                             | 0.04                                             | 0.01                                            |
| Finland                     | 3232                                                           | 0.1                                            | 0.20                               | 0.3                                | 0.1                               | no data                                                  | 0.00                                             | 0.19                                             | 0.01                                            |
| Lithuania                   | 2819                                                           | 0.1                                            | 0.17                               | 0.3                                | 0.1                               | no data                                                  | 0.00                                             | no data                                          | 0.00                                            |
| Hungary                     | 2309                                                           | 0.1                                            | 0.14                               | 0.2                                | 0.1                               | <u>9.4</u>                                               | 0.07                                             | 0.22                                             | 0.01                                            |
| Latvia                      | 2309                                                           | 0.1                                            | 0.14                               | 0.2                                | 0.1                               | no data                                                  | 0.00                                             | 0.03                                             | 0.00                                            |
| Luxembourg                  | 2309                                                           | 0.1                                            | 0.14                               | 0.2                                | 0.1                               | no data                                                  | 0.00                                             | no data                                          | 0.00                                            |
| Republic of North Macedonia | 2142                                                           | 0.1                                            | 0.13                               | 0.2                                | 0.1                               | <u>7.3</u>                                               | 0.00                                             | no data                                          | 0.00                                            |
| Slovenia                    | 1616                                                           | 0.1                                            | 0.10                               | 0.2                                | 0.1                               | <u>4.5</u>                                               | 0.00                                             | no data                                          | 0.01                                            |
| Estonia                     | 597                                                            | 0.0                                            | 0.04                               | 0.1                                | 0.0                               | 0.0                                                      | 0.00                                             | no data                                          | 0.00                                            |
| Sum                         |                                                                | 22.4                                           | 36.8                               | 60.5                               | 19.8                              | 690.6                                                    | 15.3                                             | 8.4                                              | 1.2                                             |
|                             |                                                                |                                                |                                    |                                    | Potential share of local supply   | <u>2983%</u>                                             | 41%                                              | 14%                                              | 6%                                              |

\* Approximated from cement production data taken from Statista<sup>53</sup>.

\*\* Approximated using a lower heating value of 27 GJ t<sup>-1</sup> (coal)<sup>54</sup>, 16.45 GJ t<sup>-1</sup> (wood pellets)<sup>55</sup>, 30.5 GJ t<sup>-1</sup> (end of life tyres)<sup>56</sup>, 10 GJ t<sup>-1</sup> (dried sewage sludge)<sup>56</sup>.

**Table S2: Overview of suggested measures to reach CO<sub>2</sub> neutrality in the cement industry with references. Previously published in Strunge, et al.<sup>51</sup>.**

| Overarching Theme            | Intervention                   | Measure                                      | Type* | Ref.             |
|------------------------------|--------------------------------|----------------------------------------------|-------|------------------|
| Efficiency & substitution    | Improve clinker production     | Energy efficiency                            | E     | 3,57,58          |
|                              |                                | Alternative fuels / Biofuels                 | E     | 3,30,57-60       |
|                              |                                | Process electrification                      | E     | 3,61             |
|                              | Improve cement production      | Supplementary cementitious materials (SCM)   | PO&E  | 57-60            |
|                              |                                | Improved grinding                            | E     | 57               |
|                              |                                | Improved estimation of cement needs          | O     | 3,57             |
| Recycling & circular economy | Improve usage of cement        | Improving structural elements                | O     | 57               |
|                              |                                | Cement & concrete recycling                  | PO&E  | 57,62            |
|                              | Reuse of concrete elements     | Alternative clinkers                         | O     | 3,57             |
|                              |                                | Carbon capture and storage                   | PO&E  | 3,57,58,60,63-66 |
| New technologies             | Carbon capture and utilisation | CO <sub>2</sub> mineralisation               | PO&E  | 3,47,58,67,68    |
|                              |                                | CO <sub>2</sub> to chemicals                 | PO&E  | 3,67             |
|                              |                                | CO <sub>2</sub> to fuels                     | PO&E  | 3,67             |
|                              |                                | CO <sub>2</sub> usage without transformation | PO&E  | 3,67             |
|                              | Alternative building materials | O                                            | 59,69 |                  |

\*The measure's type describes which type of emissions they can tackle: **E**, means the measure can tackle **energy**-related emissions. **PO** means it can tackle **process**-inherent emissions and **O** means it lowers overall emissions of the cement sector by **other** means (i.e., via lowering the usage of cement overall).

| Table     | S3:                                                                                                                                                    | Description                                                | of                                                 | grid | point | types. |
|-----------|--------------------------------------------------------------------------------------------------------------------------------------------------------|------------------------------------------------------------|----------------------------------------------------|------|-------|--------|
| Type      | Description                                                                                                                                            | Type of interventions that can be built here.              | Type of CO <sub>2</sub> infrastructure connections |      |       |        |
| CEMENT    | On a cement plant grid point a cement plant can be specified as an existing plant and a capacity (i.e., demand for cement can be set).                 | All cement intervention and direct air capture plants.     | Onshore                                            |      |       |        |
| TERMINAL  | A terminal connects onshore and offshore points. Here CO <sub>2</sub> compressors can be built to compress CO <sub>2</sub> for offshore pipelines.     | CO <sub>2</sub> compressors and direct air capture plants. | Onshore and offshore                               |      |       |        |
| STORAGE   | A storage site for this model is specified as offshore points, where CO <sub>2</sub> injection sites can be built.                                     | CO <sub>2</sub> injection site.                            | Offshore                                           |      |       |        |
| TRUNKLINE | Trunkline points are points, where trunklines can be connected to. Trunkline points can be specified with or without actual connections to trunklines. | Direct air capture.                                        | Onshore                                            |      |       |        |

**Table S4 : Estimated pipeline sizes for currently planned pipeline projects in United Kingdom and Germany.**

| Country        | Project Title | Estimated pipe size | Estimated total capacity [MtCO <sub>2</sub> a <sup>-1</sup> ] | Load factor |
|----------------|---------------|---------------------|---------------------------------------------------------------|-------------|
| United Kingdom | Acorn Project | 32INCH Onshore      | 16                                                            | 0.5         |
| United Kingdom | Viking CCS    | 28INCH Onshore      | 10                                                            | 0.5         |
| United Kingdom | Hynet         | 28INCH Onshore      | 10                                                            | 0.5         |
| United Kingdom | Humber        | 28INCH Onshore      | 12.1                                                          | 0.5         |
| Germany        | OGS starter   | 32INCH Onshore      | 18.8                                                          | 0.5         |
| Germany        | OGS full      | 32INCH Onshore      | /                                                             | 0.5         |

**Table S5: Defined ranges for feedstock costs.**

| Description              | Min   | Max   | Assumption used in case studies | Unit                | Reference                     |
|--------------------------|-------|-------|---------------------------------|---------------------|-------------------------------|
| Biofuel costs            | 7     | 25    | 15                              | € GJ <sup>-1</sup>  | 70                            |
| Clay costs               | 20    | 150   | 30                              | € t <sup>-1</sup>   | Own estimation, <sup>71</sup> |
| Olivine costs            | 3.5   | 23    | 5                               | € t <sup>-1</sup>   | <sup>72-74</sup>              |
| Electricity price (2030) | 38*   | 200** | 62                              | € MWh <sup>-1</sup> | <sup>75</sup>                 |
| Price natural gas (2030) | 16.2* | 41**  | 32                              | € MWh <sup>-1</sup> | <sup>76</sup>                 |
| Price coal (2030)        | 2.1*  | 6.3** | 3                               | € GJ <sup>-1</sup>  | <sup>77</sup>                 |

All energy costs have been bundled into a low-cost scenario marked as \* and a high-cost scenario marked as \*\*.

**Table S6: General assumptions**

| General model assumptions                                                                    |                                                                                                                                                                                                                                                                                                                                                                                                                                                                                                             |                                           |
|----------------------------------------------------------------------------------------------|-------------------------------------------------------------------------------------------------------------------------------------------------------------------------------------------------------------------------------------------------------------------------------------------------------------------------------------------------------------------------------------------------------------------------------------------------------------------------------------------------------------|-------------------------------------------|
| Variable                                                                                     | Assumption                                                                                                                                                                                                                                                                                                                                                                                                                                                                                                  |                                           |
| Clinker factor                                                                               | For all cement plants and cost of cement we consider a clinker factor of 100%.                                                                                                                                                                                                                                                                                                                                                                                                                              |                                           |
| Cement plant capacity                                                                        | As CO <sub>2</sub> networks need to be designed for a full capacity. We took each cement plant's capacity from Tkachenko, <i>et al.</i> <sup>78</sup> and applied the clinker factor of 0.737 <sup>54</sup> to reach a plants capacity. When clinker is replaced by an innovation we consider further replacement of clinker.                                                                                                                                                                               |                                           |
| European cement market                                                                       | A key assumption here is that the currently existing cement plants can and will continue to produce at the capacity they are currently, i.e., European cement demand will remain constant until 2050 and is not further replaced by imports. This assumption appears commensurate with current EU and UK policy, which attempts to shield domestic production (thus jobs) from 'cheap, possibly higher CO <sub>2</sub> intensive imports', e.g., via carbon border adjustment mechanisms <sup>79,80</sup> . |                                           |
| Fuel conventional cement production                                                          | As fuel in conventional cement production we consider coal to be used. As alternative fuel usage differs between plants and might itself lead to emissions, current use of alternative fuels (such as municipal waste) was not considered.                                                                                                                                                                                                                                                                  |                                           |
| Free allowances CO <sub>2</sub> certificates                                                 | As our model uses a net-zero approach, we do not consider free allowed of CO <sub>2</sub> certificates in the model.                                                                                                                                                                                                                                                                                                                                                                                        |                                           |
| General economic assumptions                                                                 |                                                                                                                                                                                                                                                                                                                                                                                                                                                                                                             |                                           |
| Variable                                                                                     | Value                                                                                                                                                                                                                                                                                                                                                                                                                                                                                                       | Reference                                 |
| Working hours                                                                                | 8000h a <sup>-1</sup>                                                                                                                                                                                                                                                                                                                                                                                                                                                                                       | <sup>60</sup>                             |
| Lifetime*                                                                                    | 30 years                                                                                                                                                                                                                                                                                                                                                                                                                                                                                                    | Own estimation                            |
| Overall interest*<br>(Including interest on equity and dept)                                 | 7.69%                                                                                                                                                                                                                                                                                                                                                                                                                                                                                                       | <sup>81-84</sup>                          |
| Extraction Costs Mineral*                                                                    | 12€ t <sup>-1</sup>                                                                                                                                                                                                                                                                                                                                                                                                                                                                                         | <sup>72</sup>                             |
| Transport costs                                                                              | 0.04€ t <sup>-1</sup> km <sup>-1</sup> truck<br>0.032€ t <sup>-1</sup> km <sup>-1</sup> train<br>0.0032€ t <sup>-1</sup> km <sup>-1</sup> ship                                                                                                                                                                                                                                                                                                                                                              | <sup>72</sup>                             |
| Electricity price*                                                                           | 62€ MWh <sup>-1</sup>                                                                                                                                                                                                                                                                                                                                                                                                                                                                                       | <sup>75</sup>                             |
| Natural gas price*                                                                           | 32€ MWh <sup>-1</sup>                                                                                                                                                                                                                                                                                                                                                                                                                                                                                       | <sup>76</sup>                             |
| Price NaHCO <sub>3</sub> *                                                                   | 209€ t <sup>-1</sup>                                                                                                                                                                                                                                                                                                                                                                                                                                                                                        | Comparison of vendor prices <sup>85</sup> |
| Price NaCl*                                                                                  | 61.6€ t <sup>-1</sup>                                                                                                                                                                                                                                                                                                                                                                                                                                                                                       | Comparison of vendor prices <sup>85</sup> |
| Price MEA*                                                                                   | 1320€ t <sup>-1</sup>                                                                                                                                                                                                                                                                                                                                                                                                                                                                                       | Comparison of vendor prices <sup>85</sup> |
| Capital expenditure assumptions for interventions                                            |                                                                                                                                                                                                                                                                                                                                                                                                                                                                                                             |                                           |
| Technology                                                                                   | Value                                                                                                                                                                                                                                                                                                                                                                                                                                                                                                       | Reference                                 |
| MEA capture for 765kt <sub>CO2</sub> a <sup>-1</sup>                                         | TDC = €47.6 M                                                                                                                                                                                                                                                                                                                                                                                                                                                                                               | <sup>6</sup>                              |
| CO <sub>2</sub> mineralisation plant with a capacity of 750kt <sub>SCM</sub> a <sup>-1</sup> | TDC = €93.4 M                                                                                                                                                                                                                                                                                                                                                                                                                                                                                               | <sup>19</sup>                             |
| Calcliner for calcined clay with capacity of 300kt <sub>clay</sub> a <sup>-1</sup>           | TDC = €24 M                                                                                                                                                                                                                                                                                                                                                                                                                                                                                                 | <sup>28</sup>                             |

\*We considered the same lifetime for plants and storage sites. The solver would only choose a storage site, if it can be used for this amount of years, given the calculated flow of liquified CO<sub>2</sub> in the pipeline.

**Table S7: Factors used for TCR calculation.**

| Description           | Value  | Reference |
|-----------------------|--------|-----------|
| Indirect costs        | 14%    | 54        |
| Process contingencies | 40%    | 86,87     |
| Project contingencies | 30%    | 86        |
| Owner's costs         | 7%     | 88        |
| Learning rate         | 10.5%* | 89        |
| Number of plants      | 20     | 90        |

\* For baseline cement plants, as well as for CO<sub>2</sub> infrastructure (i.e., pipelines, recompression stations between onshore and offshore pipelines) as well as CO<sub>2</sub> injection sites, we do not consider technological learning and learning rate is set to 0%.

**Table S7: Factors used for OPEX calculations.**

| Description                | Value                            | Reference |
|----------------------------|----------------------------------|-----------|
| Insurance and local tax    | 2% of TPC                        | 54        |
| Maintenance                | 2.5% of TPC                      | 54        |
| Administration and support | 30% of operating and maintenance | 54        |

**Table S8: Process assumptions**

| Process                        | Variable                                  | Value   | Unit                                           | Reference                    |
|--------------------------------|-------------------------------------------|---------|------------------------------------------------|------------------------------|
| Clinker production             | Electricity needs                         | 0.132   | MWh t <sup>-1</sup> <sub>clinker</sub>         | 6                            |
|                                | Heating                                   | 3       | GJ t <sup>-1</sup> <sub>clinker</sub>          | 6                            |
|                                | Energy density Coal (LHV)                 | 27150   | kJ kg <sup>-1</sup>                            | 6                            |
|                                | Raw meal/clinker                          | 1.6     | t t <sup>-1</sup> <sub>clinker</sub>           | 6                            |
|                                | Ammonia for SNCR                          | 0.005   | t t <sup>-1</sup> <sub>clinker</sub>           | 6                            |
|                                | other variable costs                      | 1.1     | € t <sup>-1</sup> <sub>clinker</sub>           | 6                            |
|                                | Electricity needs                         | 0.132   | MWh t <sup>-1</sup> <sub>clinker</sub>         | 6                            |
| CO <sub>2</sub> capture        | Heating                                   | 3       | GJ t <sup>-1</sup> <sub>clinker</sub>          | 6                            |
|                                | Electricity needs (capture & compression) | 0.32    | MWh t <sup>-1</sup> CO <sub>2</sub>            | 91                           |
|                                | Heating (capture)                         | 3.6     | GJ t <sup>-1</sup> CO <sub>2</sub>             | 91                           |
|                                | Cooling water (capture)                   | 3.39    | m <sup>3</sup> t <sup>-1</sup> CO <sub>2</sub> | 6                            |
|                                | MEA makeup (capture)                      | 0.0015  | t t <sup>-1</sup> CO <sub>2</sub>              | 92                           |
|                                | Capture rate                              | 0.9     | t t <sup>-1</sup> CO <sub>2</sub>              | 6                            |
|                                | Electricity needs                         | 426.45  | kWh t <sup>-1</sup> <sub>SCM</sub>             | 19                           |
| CO <sub>2</sub> mineralisation | Heating                                   | 124.952 | kWh t <sup>-1</sup> <sub>SCM</sub>             | 19                           |
|                                | Mineral (Olivine)                         | 2.1988  | t t <sup>-1</sup> CO <sub>2</sub>              | 19                           |
|                                | NaHCO <sub>3</sub>                        | 0.0324  | t t <sup>-1</sup> CO <sub>2</sub>              | 19                           |
|                                | NaCl                                      | 0.0338  | t t <sup>-1</sup> CO <sub>2</sub>              | 19                           |
|                                | Process water                             | 0.775   | m <sup>3</sup> t <sup>-1</sup> CO <sub>2</sub> | 19                           |
|                                | Electricity needs                         | 426.445 | kWh t <sup>-1</sup> <sub>SCM</sub>             | 19                           |
|                                | Electricity needs                         | 0.016   | MWh t <sup>-1</sup> <sub>LC3 cement</sub>      | 28                           |
| Calcined clay                  | Electricity needs grinding                | 0.024   | MWh t <sup>-1</sup> <sub>LC3 cement</sub>      | 28                           |
|                                | Heating                                   | 2.775   | GJ t <sup>-1</sup> <sub>calcined clay</sub>    | 28                           |
|                                | Clay requirements                         | 1.16    | t t <sup>-1</sup> <sub>calcined clay</sub>     | * derived from Stoichiometry |
|                                | Calcined clay in LC3                      | 0.3     | t t <sup>-1</sup> <sub>LC3 cement</sub>        | 28                           |
|                                | Clinker in LC3                            | 0.5     | t t <sup>-1</sup> <sub>LC3 cement</sub>        | 28                           |
|                                | Gypsum in LC3                             | 0.05    | t t <sup>-1</sup> <sub>LC3 cement</sub>        | 28                           |
|                                | Limestone in LC3                          | 0.15    | t t <sup>-1</sup> <sub>LC3 cement</sub>        | 28                           |
| Biofuel                        | Electricity needs                         | 0.016   | MWh t <sup>-1</sup> <sub>LC3 cement</sub>      | 28                           |
|                                | Electricity needs grinding                | 0.024   | MWh t <sup>-1</sup> <sub>LC3 cement</sub>      | 28                           |
|                                | Heating                                   | 2.775   | GJ t <sup>-1</sup> <sub>calcined clay</sub>    | 28                           |
|                                | Energy density hardwood pallets           | 16.45   | GJ t <sup>-1</sup> <sub>pellet</sub>           | 55                           |

**Table S9: Assumptions carbon footprint reduction assessment. The assessment was adapted from Ostovari et al. 25. Multiple values are not displayed, as they belong to propriety datasets. Some propriety data shown here has before been published in Ostovari et al. 25 with the approval of the GaBi.**

| Description                                     | Name of data set                                                                        | Database / Reference                                      | Year | Value  | Unit                                                |
|-------------------------------------------------|-----------------------------------------------------------------------------------------|-----------------------------------------------------------|------|--------|-----------------------------------------------------|
| Electricity emission grid                       | Electricity grid mix [EU-28]                                                            | GaBi ts <sup>93</sup> GaBi ts <sup>93</sup>               | 2016 | 417    | kgCO <sub>2e</sub> MWh <sup>-1</sup>                |
| Natural gas emission                            | Thermal energy from natural gas [EU-28]                                                 | GaBi ts <sup>93</sup> GaBi ts <sup>93</sup>               | 2016 | 241.0  | kgCO <sub>2e</sub> MWh <sup>-1</sup>                |
| Transport train                                 | Rail transport, average train, gross tonne weight 1000t / 726t payload capacity [EU-28] | GaBi ts <sup>93</sup> GaBi ts <sup>93</sup>               | 2016 | 0.0258 | kgCO <sub>2e</sub> km <sup>-1</sup> t <sup>-1</sup> |
| Transport truck                                 | Transport, small truck (up to 14 t total cap., 9.3t payload) [EU-28]                    | GaBi ts <sup>93</sup> GaBi ts <sup>93</sup>               | 2016 | 0.0791 | kgCO <sub>2e</sub> km <sup>-1</sup> t <sup>-1</sup> |
| Transport ship                                  | /                                                                                       | Psarafitis and Kontovas <sup>94</sup>                     | /    | 0.033  | kgCO <sub>2e</sub> km <sup>-1</sup> t <sup>-1</sup> |
| Water                                           | Process water [EU-28]                                                                   | GaBi ts <sup>93</sup> GaBi ts <sup>93</sup>               | 2016 | /      | kgCO <sub>2e</sub> t <sup>-1</sup>                  |
| NaHCO <sub>3</sub>                              | Sodium bicarbonate                                                                      | GaBi ts <sup>93</sup> GaBi ts <sup>93</sup>               | 2017 | /      | kgCO <sub>2e</sub> t <sup>-1</sup>                  |
| NaCl                                            | Sodium chloride (rock salt) [EU-28]                                                     | GaBi ts <sup>93</sup> GaBi ts <sup>93</sup>               | 2016 | /      | kgCO <sub>2e</sub> t <sup>-1</sup>                  |
| (NH <sub>4</sub> ) <sub>2</sub> SO <sub>4</sub> | Ammonium sulfate production [RoW]                                                       | Ecoinvent 3.71 <sup>95</sup> Ecoinvent 3.71 <sup>95</sup> | 2019 | /      | kgCO <sub>2e</sub> t <sup>-1</sup>                  |
| Monoethanol-amine                               | /                                                                                       | Pehnt and Henke <sup>92</sup>                             | /    | /      | kgCO <sub>2e</sub> t <sup>-1</sup>                  |
| Mining Mineral                                  | /                                                                                       | Ostovari, et al. <sup>26</sup>                            | /    | 5.23   | kWh t <sup>-1</sup>                                 |
| Wood chips                                      | /                                                                                       | Eco Invent 3.10                                           | /    | /      | kgCO <sub>2e</sub> t <sup>-1</sup>                  |

**Table S10: Summary of costs for each cement intervention.**

| Nr | Type of intervention | Where can this be installed? | Process                                                     | Capacity [Mt a <sup>-1</sup> ] | TCR [M€] | OPEX <sub>fixed</sub> [€ a <sup>-1</sup> ] | OPEX <sub>var.</sub> [€ t <sup>-1</sup> <sub>cement</sub> ] |
|----|----------------------|------------------------------|-------------------------------------------------------------|--------------------------------|----------|--------------------------------------------|-------------------------------------------------------------|
| 1  | Baseline             | Incumbent                    | Integrated cement plant                                     | 1                              | 219      | 10                                         | 24                                                          |
| 2  | Intervention         | for Cement plant             | Carbon capture                                              | 1                              | 53       | 3                                          | 32                                                          |
| 3  | Intervention         | for Cement plant             | Biofuels                                                    | 1                              | 0        | 0                                          | 38                                                          |
| 4  | Intervention         | for Cement plant             | Carbon capture and biofuels                                 | 1                              | 53       | 3                                          | 70                                                          |
| 5  | Intervention         | for Cement plant             | CO <sub>2</sub> Mineralisation                              | 1                              | 64       | 4                                          | 15                                                          |
| 6  | Intervention         | for Cement plant             | Biofuels and CO <sub>2</sub> Mineralisation                 | 1                              | 64       | 4                                          | 42                                                          |
| 7  | Intervention         | for Cement plant             | Carbon capture, biofuels and CO <sub>2</sub> Mineralisation | 1                              | 77       | 5                                          | 52                                                          |

**Table S11: Summary of costs for Direct Air Capture plants.**

| Nr | Type of intervention | Where can this be installed? | Process                  | Capacity [Mt a <sup>-1</sup> ] | TCR [M€] | OPEX <sub>fixed</sub> [€ a <sup>-1</sup> ] | OPEX <sub>var.</sub> [€ t <sup>-1</sup> CO <sub>2</sub> ] | Reference |
|----|----------------------|------------------------------|--------------------------|--------------------------------|----------|--------------------------------------------|-----------------------------------------------------------|-----------|
| 1  | New plant            | Everywhere                   | Solvent-based DAC (FOAK) | 0.98                           | 1663     | 66.8                                       | 2                                                         | 96        |
| 2  | New plant            | Everywhere                   | Solvent-based DAC (NOAK) | 0.98                           | 571      | 37.6                                       | 2                                                         | 96        |
| 3  | New plant            | Everywhere                   | Solid sorbent DAC (FOAK) | 0.000959 g*                    | 11       | 3                                          | 115                                                       | 96        |
| 4  | New plant            | Everywhere                   | Solid sorbent DAC (NOAK) | 0.000959 g*                    | 1        | 0.4                                        | 69                                                        | 96        |



**Table S12: Summary of costs for CO<sub>2</sub> Transport**

| Type of intervention | Where can this be installed? | Type                              | Capacity [tCO <sub>2</sub> 30min <sup>-1</sup> ] | TCR d <sup>-1</sup> * [M€ km <sup>-1</sup> ] | OPEX <sub>fixed</sub> [M€ a <sup>-1</sup> ] | OPEX <sub>var</sub> [€ t <sup>-1</sup> CO <sub>2</sub> ] | Reference |
|----------------------|------------------------------|-----------------------------------|--------------------------------------------------|----------------------------------------------|---------------------------------------------|----------------------------------------------------------|-----------|
| New pipe             | Onshore                      | 12INCH                            | 114.2                                            | 0.52                                         | /                                           | 2.9E-09                                                  | 97,98     |
| New pipe             | Onshore                      | 16INCH                            | 285.4                                            | 0.93                                         | /                                           | 2.9E-09                                                  | 97,98     |
| New pipe             | Onshore                      | 24INCH                            | 570.8                                            | 1.30                                         | /                                           | 2.9E-09                                                  | 97,98     |
| New pipe             | Onshore                      | 28INCH                            | 856.2                                            | 1.46                                         | /                                           | 2.9E-09                                                  | 97,98     |
| New pipe             | Onshore                      | 32INCH                            | 1426.9                                           | 1.62                                         | /                                           | 2.9E-09                                                  | 97,98     |
| New pipe             | Onshore                      | 40INCH                            | 2397.3                                           | 2.18                                         | /                                           | 2.9E-09                                                  | 97,98     |
| New pipe             | Offshore                     | 12INCH                            | 114.2                                            | 1.02                                         | /                                           | 7.6E-09                                                  | 97,98     |
| New pipe             | Offshore                     | 16INCH                            | 285.4                                            | 1.21                                         | /                                           | 7.6E-09                                                  | 97,98     |
| New pipe             | Offshore                     | 24INCH                            | 570.8                                            | 1.69                                         | /                                           | 7.6E-09                                                  | 97,98     |
| New pipe             | Offshore                     | 28INCH                            | 856.2                                            | 1.90                                         | /                                           | 7.6E-09                                                  | 97,98     |
| New pipe             | Offshore                     | 32INCH                            | 1426.9                                           | 2.11                                         | /                                           | 7.6E-09                                                  | 97,98     |
| Type of intervention | Where can this be installed? | Type                              | Capacity [tCO <sub>2</sub> 30min <sup>-1</sup> ] | TCR [M€]                                     | OPEX <sub>fixed</sub> [M€ a <sup>-1</sup> ] | OPEX <sub>var</sub> [€ t <sup>-1</sup> CO <sub>2</sub> ] | Reference |
| New unit             | /                            | Small CO <sub>2</sub> compressor* | 63.5                                             | 2.20                                         | 0.09                                        | 4.06E-04                                                 | 97        |
| New unit             | /                            | Large CO <sub>2</sub> compressor* | 635.4                                            | 22.0                                         | 0.88                                        | 4.06E-03                                                 | 97        |

\*The capital costs are reported in TCR in M€ per distance (d) in km.

\*\*A compressor needs to be placed between onshore and offshore pipelines.

**Table S13: Changes in OPEX<sub>variable</sub> for different feedstock and fuel price scenarios in € t<sup>-1</sup><sub>cement</sub>.**

| Intervention                                               | Min biofuel | Max biofuel | Min olivine | Max olivine | Min clay | Max clay | Min energy | Max energy |
|------------------------------------------------------------|-------------|-------------|-------------|-------------|----------|----------|------------|------------|
| Integrated cement plant                                    | 0.00 €      | 0.00 €      | 0.00 €      | 0.00 €      | 0.00 €   | 0.00 €   | -4.98 €    | 34.06 €    |
| Carbon capture                                             | 0.00 €      | 0.00 €      | 0.00 €      | 0.00 €      | 0.00 €   | 0.00 €   | -16.50 €   | 25.23 €    |
| Biofuels                                                   | -25.04 €    | 31.38 €     | 0.00 €      | 0.00 €      | 0.00 €   | 0.00 €   | 3.19 €     | -11.69 €   |
| Carbon capture, biomass                                    | -25.04 €    | 31.38 €     | 0.00 €      | 0.00 €      | 0.00 €   | 0.00 €   | -13.31 €   | 13.54 €    |
| CO <sub>2</sub> Mineralisation                             | 0.00 €      | 0.00 €      | -0.58 €     | 6.96 €      | 0.00 €   | 0.00 €   | -4.43 €    | 14.22 €    |
| Biofuels and CO <sub>2</sub> Mineralisation                | -17.53 €    | 21.97 €     | -0.58 €     | 6.96 €      | 0.00 €   | 0.00 €   | -2.20 €    | 6.04 €     |
| Carbon capture, biomass and CO <sub>2</sub> Mineralisation | -17.53 €    | 21.97 €     | -0.58 €     | 6.96 €      | 0.00 €   | 0.00 €   | -9.40 €    | 10.90 €    |
| Carbon Capture and CO <sub>2</sub> Mineralisation          | 0.00 €      | 0.00 €      | -0.58 €     | 6.96 €      | 0.00 €   | 0.00 €   | -11.63 €   | 19.08 €    |
| Calcined clay                                              | 0.00 €      | 0.00 €      | 0.00 €      | 0.00 €      | -3.49 €  | 41.84 €  | 1.95 €     | -10.25 €   |
| Calcined clay, biomass                                     | -19.17 €    | 24.03 €     | 0.00 €      | 0.00 €      | -3.49 €  | 41.84 €  | 3.54 €     | -16.10 €   |
| CCS, calcined clay                                         | 0.00 €      | 0.00 €      | 0.00 €      | 0.00 €      | -3.49 €  | 41.84 €  | -6.56 €    | -1.98 €    |
| CCS, calcined clay, biomass                                | -19.17 €    | 24.03 €     | 0.00 €      | 0.00 €      | -3.49 €  | 41.84 €  | -5.71 €    | 8.96 €     |

**Table S14: Breakdown of costs for baseline cement plant. Excluding transport of feedstock or CO<sub>2</sub>. Calculations based on Voldsund, et al.<sup>6</sup>.**

|                                  | Baseline cement plant | Unit                                 |
|----------------------------------|-----------------------|--------------------------------------|
| Capacity                         | 1000000               | t <sub>clinker</sub> a <sup>-1</sup> |
|                                  | 1000000               | t <sub>cement</sub> a <sup>-1</sup>  |
| <b>Capital costs</b>             |                       |                                      |
| TDC (with project contingencies) | 149.80                | M€                                   |
| EPC                              | 170.77                | M€                                   |
| TPC                              | 193.24                | M€                                   |
| TPC Nth of a kind                | 193.24                | M€                                   |
| TCR Nth of a kind                | 218.59                | M€                                   |
| annualized TCR                   | 19.94                 | M€ a <sup>-1</sup>                   |
| <b>Fixed Opex</b>                |                       |                                      |
| Insurance and loc. Tax           | 3.86                  | M€ a <sup>-1</sup>                   |
| Maintenance                      | 4.83                  | M€ a <sup>-1</sup>                   |
| Labour Operating                 | 0.78                  | M€ a <sup>-1</sup>                   |
| Labour Admin                     | 0.82                  | M€ a <sup>-1</sup>                   |
| Fixed Opex                       | 10.30                 | M€ a <sup>-1</sup>                   |
| <b>Variable Opex</b>             |                       |                                      |
| Electricity                      | 8.18                  | M€ a <sup>-1</sup>                   |
| Coal                             | 9.40                  | M€ a <sup>-1</sup>                   |
| Raw Meal                         | 5.00                  | M€ a <sup>-1</sup>                   |
| Ammonia for SNR                  | 0.65                  | M€ a <sup>-1</sup>                   |
| Other                            | 1.10                  | M€ a <sup>-1</sup>                   |

|                                  |       |                          |
|----------------------------------|-------|--------------------------|
| Variable Opex                    | 24.33 | M€ a <sup>-1</sup>       |
| Specific variable opex           | 24.33 | € t <sup>-1</sup> cement |
| <b>Levelised costs of cement</b> |       |                          |
| Levelised Costs                  | 54.57 | € t <sup>-1</sup> cement |

**Table S15: Breakdown of costs for cement plant with CCS. Excluding transport of feedstock or CO<sub>2</sub>. Calculations based on Voldsund, et al.<sup>6</sup>.**

| Cement plant with CCS                             |         | Unit                             |
|---------------------------------------------------|---------|----------------------------------|
| Capacity                                          | 1000000 | tclinker                         |
|                                                   | 1000000 | t cement                         |
| Capacity                                          | 765000  | tCO <sub>2</sub> a <sup>-1</sup> |
| <b>Capital costs</b>                              |         |                                  |
| TDC <sub>capture</sub>                            | 47.60   | M€                               |
| EPC <sub>capture</sub>                            | 50.93   | M€                               |
| TPC <sub>capture</sub>                            | 91.39   | M€                               |
| TPC Nth of a kind capture                         | 56.45   | M€                               |
| TPC Nth of a kind cement                          | 193.24  | M€                               |
| TPC Nth of a kind Total                           | 249.69  | M€                               |
| TCR Nth of a kind Total                           | 271.51  | M€                               |
| annualized TCR                                    | 27.02   | M€ a <sup>-1</sup>               |
| <b>Fixed Opex</b>                                 |         |                                  |
| Insurance and loc. Tax                            | 4.99    | M€ a <sup>-1</sup>               |
| Maintenance                                       | 6.24    | M€ a <sup>-1</sup>               |
| Labour Operating                                  | 0.78    | M€ a <sup>-1</sup>               |
| Labour Admin                                      | 0.98    | M€ a <sup>-1</sup>               |
| Fixed Opex                                        | 13.00   | M€ a <sup>-1</sup>               |
| <b>Variable Opex</b>                              |         |                                  |
| electricity                                       | 23.35   | M€ a <sup>-1</sup>               |
| Steam                                             | 19.13   | M€ a <sup>-1</sup>               |
| Coal                                              | 9.40    | M€ a <sup>-1</sup>               |
| Raw Meal                                          | 5.00    | M€ a <sup>-1</sup>               |
| Ammonia for SNR                                   | 0.65    | M€ a <sup>-1</sup>               |
| Other                                             | 1.10    | M€ a <sup>-1</sup>               |
| Cooling water                                     | 1.01    | M€ a <sup>-1</sup>               |
| MEA makeup                                        | 1.51    | M€ a <sup>-1</sup>               |
| Variable Opex                                     | 61.15   | M€ a <sup>-1</sup>               |
| Specific variable opex                            | 61.15   | € t <sup>-1</sup> cement         |
| Specific variable opex w/o electricity and natgas | 18.68   | € t <sup>-1</sup> cement         |
| <b>Levelised costs of cement</b>                  |         |                                  |
| Levelised Costs of cement                         | 101.18  | € t <sup>-1</sup> cement         |

**Table S16: Breakdown of costs for cement plant with biofuel. Excluding transport of feedstock or CO<sub>2</sub>. Calculations based on Voldsund, et al.<sup>6</sup> and Telmo and Lousada<sup>55</sup>.**

| Cement plant with biofuel                         |         | Unit                     |
|---------------------------------------------------|---------|--------------------------|
| Capacity                                          | 1000000 | tclinker                 |
|                                                   | 1000000 | t cement                 |
| <b>Capital costs</b>                              |         |                          |
| TDC (with project contingencies)                  | 149.80  | M€                       |
| EPC                                               | 170.77  | M€                       |
| TPC                                               | 193.24  | M€                       |
| TPC Nth of a kind                                 | 193.24  | M€                       |
| TCR Nth of a kind                                 | 218.59  | M€                       |
| annualized TCR                                    | 19.94   | M€ a <sup>-1</sup>       |
| <b>Fixed Opex</b>                                 |         |                          |
| Insurance and loc. Tax                            | 3.86    | M€ a <sup>-1</sup>       |
| Maintenance                                       | 4.83    | M€ a <sup>-1</sup>       |
| Labour Operating                                  | 0.78    | M€ a <sup>-1</sup>       |
| Labour Admin                                      | 0.82    | M€ a <sup>-1</sup>       |
| Fixed Opex                                        | 10.30   | M€ a <sup>-1</sup>       |
| <b>Variable Opex</b>                              |         |                          |
| Electricity                                       | 8.18    | M€ a <sup>-1</sup>       |
| Wood pellets                                      | 46.98   | M€ a <sup>-1</sup>       |
| Raw Meal                                          | 5.00    | M€ a <sup>-1</sup>       |
| Ammonia for SNR                                   | 0.65    | M€ a <sup>-1</sup>       |
| Other                                             | 1.10    | M€ a <sup>-1</sup>       |
| Variable Opex                                     | 61.91   | M€ a <sup>-1</sup>       |
| Specific variable opex                            | 61.91   | € t <sup>-1</sup> cement |
| Specific variable opex w/o electricity and natgas | 53.73   | € t <sup>-1</sup> cement |
| <b>Levelised costs of cement</b>                  |         |                          |
| Levelised Costs                                   | 92.15   | € t <sup>-1</sup> cement |

**Table S17: Breakdown of costs for cement plant with CCS, biofuel. Excluding transport of feedstock or CO<sub>2</sub>. Calculations based on Voldsund, et al.<sup>6</sup> and Telmo and Lousada<sup>55</sup>.**

| <b>Cement plant with CCS, biofuel</b>             |         | <b>Unit</b>                         |
|---------------------------------------------------|---------|-------------------------------------|
| Capacity                                          | 1000000 | tclinker                            |
|                                                   | 1000000 | tcement                             |
| Capacity                                          | 765000  | tCO <sub>2</sub> a <sup>-1</sup>    |
| <b>Capital costs</b>                              |         |                                     |
| TDC <sub>capture</sub>                            | 47.60   | M€                                  |
| EPC <sub>capture</sub>                            | 50.93   | M€                                  |
| TPC <sub>capture</sub>                            | 91.39   | M€                                  |
| TPC Nth of a kind capture                         | 56.45   | M€                                  |
| TPC Nth of a kind cement                          | 193.24  | M€                                  |
| TPC Nth of a kind Total                           | 249.69  | M€                                  |
| TCR Nth of a kind Total                           | 271.51  | M€                                  |
| annualized TCR                                    | 27.02   | M€ a <sup>-1</sup>                  |
| <b>Fixed Opex</b>                                 |         |                                     |
| Insurance and loc. Tax                            | 4.99    | M€ a <sup>-1</sup>                  |
| Maintenance                                       | 6.24    | M€ a <sup>-1</sup>                  |
| Labour Operating                                  | 0.78    | M€ a <sup>-1</sup>                  |
| Labour Admin                                      | 0.98    | M€ a <sup>-1</sup>                  |
| Fixed Opex                                        | 13.00   | M€ a <sup>-1</sup>                  |
| <b>Variable Opex</b>                              |         |                                     |
| electricity                                       | 23.35   | M€ a <sup>-1</sup>                  |
| Steam                                             | 19.13   | M€ a <sup>-1</sup>                  |
| Biomass                                           | 46.98   | M€ a <sup>-1</sup>                  |
| Raw Meal                                          | 5.00    | M€ a <sup>-1</sup>                  |
| Ammonia for SNR                                   | 0.65    | M€ a <sup>-1</sup>                  |
| Other                                             | 1.10    | M€ a <sup>-1</sup>                  |
| Cooling water                                     | 1.01    | M€ a <sup>-1</sup>                  |
| MEA makeup                                        | 1.51    | M€ a <sup>-1</sup>                  |
| Variable Opex                                     | 98.73   | M€ a <sup>-1</sup>                  |
| Specific variable opex                            | 98.73   | € t <sup>-1</sup> <sub>cement</sub> |
| Specific variable opex w/o electricity and natgas | 56.26   | € t <sup>-1</sup> <sub>cement</sub> |
| <b>Levelised costs of cement</b>                  |         |                                     |
| Levelised Costs of cement                         | 138.76  | € t <sup>-1</sup> <sub>cement</sub> |

**Table S18: Breakdown of costs for cement plant with CO<sub>2</sub> mineralisation. Excluding transport of feedstock or CO<sub>2</sub>. Calculations based on Voldsund, et al.<sup>6</sup> and Strunge, et al.<sup>19</sup>.**

| <b>Cement plant with CO<sub>2</sub> mineralisation</b> |         | <b>Unit</b>                   |
|--------------------------------------------------------|---------|-------------------------------|
| Capacity cement                                        | 1000000 | tcement a <sup>-1</sup>       |
| Capacity CO <sub>2</sub>                               | 175806  | tCO <sub>2</sub> stored a-1   |
| Capacity CO <sub>2</sub>                               | 175806  | tCO <sub>2</sub> captured a-1 |
| Capacity SCM                                           | 300000  | tscm produced a-1             |
| Capacity SCM                                           | 700000  | tclinker produced a-1         |
| <b>Capital costs</b>                                   |         |                               |
| TDC (incl. installation) Mineralisation plant          | 45.18   | M€                            |
| TDC (incl. installation) Capture plant                 | 19.70   | M€                            |
| TDC total (mineralisation & capture)                   | 64.88   | M€                            |
| EPC (mineralisation & capture)                         | 71.20   | M€                            |
| TPC (mineralisation & capture)                         | 96.96   | M€                            |
| TPC Nth of a kind (mineralisation & capture)           | 59.88   | M€                            |
| TCR Nth of a kind (mineralisation & capture)           | 64.15   | M€                            |
| TCR Nth of a kind (clinker)                            | 218.59  | M€                            |
| TCR Nth of a kind total                                | 282.74  | M€                            |
| annualized TCR                                         | 24.38   | M€ a <sup>-1</sup>            |
| <b>Fixed Opex</b>                                      |         |                               |
| Insurance and loc. Tax                                 | 5.65    |                               |
| Maintenance                                            | 7.07    | M€ a <sup>-1</sup>            |
| Labour Operating                                       | 0.58    | M€ a <sup>-1</sup>            |
| Labour Admin                                           | 1.02    | M€ a <sup>-1</sup>            |
| Fixed Opex                                             | 14.33   | M€ a <sup>-1</sup>            |
| <b>Variable Opex</b>                                   |         |                               |

|                                                   |       |                          |
|---------------------------------------------------|-------|--------------------------|
| electricity (mineralisation)                      | 7.93  | M€ a <sup>-1</sup>       |
| heat (mineralisation)                             | 1.20  | M€ a <sup>-1</sup>       |
| Mineral (mineralisation)                          | 1.93  | M€ a <sup>-1</sup>       |
| Additives (mineralisation)                        | 1.56  | M€ a <sup>-1</sup>       |
| Process water (mineralisation)                    | 0.91  | M€ a <sup>-1</sup>       |
| electricity (capture)                             | 8.33  | M€ a <sup>-1</sup>       |
| Steam (capture)                                   | 4.40  | M€ a <sup>-1</sup>       |
| Cooling water (capture)                           | 0.23  | M€ a <sup>-1</sup>       |
| MEA makeup (capture)                              | 0.35  | M€ a <sup>-1</sup>       |
| Electricity (clinker)                             | 5.73  | M€ a <sup>-1</sup>       |
| Coal (clinker)                                    | 6.58  | M€ a <sup>-1</sup>       |
| Raw Meal (clinker)                                | 3.50  | M€ a <sup>-1</sup>       |
| Ammonia for SNR (clinker)                         | 0.45  | M€ a <sup>-1</sup>       |
| Other (clinker)                                   | 0.77  | M€ a <sup>-1</sup>       |
| Variable Opex                                     | 43.86 | M€ a <sup>-1</sup>       |
| Specific                                          | 43.86 | € t <sup>-1</sup> cement |
| Specific variable opex w/o electricity and natgas | 22.01 | € t <sup>-1</sup> cement |
| <b>Levelised costs of cement</b>                  |       |                          |
| Levelised Costs of cement                         | 82.57 | € t <sup>-1</sup> cement |

**Table S19: Breakdown of costs for cement plant with CO<sub>2</sub> mineralisation, biofuel. Excluding transport of feedstock or CO<sub>2</sub>. Calculations based on Voldsund, et al.<sup>6</sup>, Strunge, et al.<sup>19</sup> and Telmo and Lousada<sup>55</sup>.**

| <b>Cement plant with CO<sub>2</sub> mineralisation, biofuel</b> |         |                               |
|-----------------------------------------------------------------|---------|-------------------------------|
|                                                                 |         | Unit                          |
| Capacity cement                                                 | 1000000 | tcement a <sup>-1</sup>       |
| Capacity CO <sub>2</sub>                                        | 175806  | tCO <sub>2</sub> stored a-1   |
| Capacity CO <sub>2</sub>                                        | 175806  | tCO <sub>2</sub> captured a-1 |
| Capacity SCM                                                    | 300000  | tscm produced a-1             |
| Capacity SCM                                                    | 700000  | tclinker produced a-1         |
| <b>Capital costs</b>                                            |         |                               |
| TDC (incl. installation) Mineralisation plant                   | 45      | M€                            |
| TDC (incl. installation) Capture plant                          | 20      | M€                            |
| TDC total (mineralisation & capture)                            | 65      | M€                            |
| EPC (mineralisation & capture)                                  | 71      | M€                            |
| TPC (mineralisation & capture)                                  | 97      | M€                            |
| TPC Nth of a kind (mineralisation & capture)                    | 60      | M€                            |
| TCR Nth of a kind (mineralisation & capture)                    | 64      | M€                            |
| TCR Nth of a kind (clinker)                                     | 219     | M€                            |
| TCR Nth of a kind total                                         | 283     | M€                            |
| annualized TCR                                                  | 24      | M€ a <sup>-1</sup>            |
| <b>Fixed Opex</b>                                               |         |                               |
| Insurance and loc. Tax                                          | 5.65    | M€ a <sup>-1</sup>            |
| Maintenance                                                     | 7.07    | M€ a <sup>-1</sup>            |
| Labour Operating                                                | 0.58    | M€ a <sup>-1</sup>            |
| Labour Admin                                                    | 1.02    | M€ a <sup>-1</sup>            |
| Fixed Opex                                                      | 14.33   | M€ a <sup>-1</sup>            |
| <b>Variable Opex</b>                                            |         |                               |
| electricity (mineralisation)                                    | 7.93    | M€ a <sup>-1</sup>            |
| heat (mineralisation)                                           | 1.20    | M€ a <sup>-1</sup>            |
| Mineral (mineralisation)                                        | 1.93    | M€ a <sup>-1</sup>            |
| Additives (mineralisation)                                      | 1.56    | M€ a <sup>-1</sup>            |
| Process water (mineralisation)                                  | 0.91    | M€ a <sup>-1</sup>            |
| electricity (capture)                                           | 8.33    | M€ a <sup>-1</sup>            |
| Steam (capture)                                                 | 4.40    | M€ a <sup>-1</sup>            |
| Cooling water (capture)                                         | 0.23    | M€ a <sup>-1</sup>            |
| MEA makeup (capture)                                            | 0.35    | M€ a <sup>-1</sup>            |
| Electricity (clinker)                                           | 5.73    | M€ a <sup>-1</sup>            |

|                                                   |        |                                     |
|---------------------------------------------------|--------|-------------------------------------|
| Coal (clinker)                                    | 32.89  | M€ a <sup>-1</sup>                  |
| Raw Meal (clinker)                                | 3.50   | M€ a <sup>-1</sup>                  |
| Ammonia for SNR (clinker)                         | 0.45   | M€ a <sup>-1</sup>                  |
| Other (clinker)                                   | 0.77   | M€ a <sup>-1</sup>                  |
| Variable Opex                                     | 70.17  | M€ a <sup>-1</sup>                  |
| Specific                                          | 70.17  | € t <sup>-1</sup> <sub>cement</sub> |
| Specific variable opex w/o electricity and natgas | 48.32  | € t <sup>-1</sup> <sub>cement</sub> |
| <b>Levelised Costs of mineralisation</b>          |        |                                     |
| Levelised Costs of cement                         | 108.88 | € t <sup>-1</sup> <sub>cement</sub> |

**Table S20: Breakdown of costs for cement plant with CO<sub>2</sub> mineralisation, CCS. Excluding transport of feedstock or CO<sub>2</sub>. Calculations based on Voldsund, et al.<sup>6</sup> and Strunge, et al.<sup>19</sup>.**

| Cement plant with CO <sub>2</sub> mineralisation, CCS |         | Unit                                |
|-------------------------------------------------------|---------|-------------------------------------|
| Capacity cement                                       | 1000000 | tcement a-1                         |
| Capacity CO <sub>2</sub>                              | 175806  | tCO <sub>2</sub> stored a-1         |
| Capacity CO <sub>2</sub>                              | 535500  | tCO <sub>2</sub> captured a-1       |
| Capacity SCM                                          | 300000  | tscm produced a-1                   |
| Capacity SCM                                          | 700000  | tclinker produced a-1               |
| <b>Capital costs</b>                                  |         |                                     |
| TDC (incl. installation) Mineralisation plant         | 45      | M€                                  |
| TDC (incl. installation) Capture plant                | 38      | M€                                  |
| TDC total (mineralisation & capture)                  | 84      | M€                                  |
| EPC (mineralisation & capture)                        | 90      | M€                                  |
| TPC (mineralisation & capture)                        | 116     | M€                                  |
| TPC Nth of a kind (mineralisation & capture)          | 71      | M€                                  |
| TCR Nth of a kind (mineralisation & capture)          | 77      | M€                                  |
| TCR Nth of a kind (clinker)                           | 219     | M€                                  |
| TCR Nth of a kind total                               | 295     | M€                                  |
| annualized TCR                                        | 25      | M€ a-1                              |
| <b>Fixed Opex</b>                                     |         |                                     |
| Insurance and loc. Tax                                | 6       | M€ a-1                              |
| Maintenance                                           | 7       | M€ a-1                              |
| Labour Operating                                      | 1       | M€ a-1                              |
| Labour Admin                                          | 1       | M€ a-1                              |
| Fixed Opex                                            | 15      | M€ a-1                              |
| <b>Variable Opex</b>                                  |         |                                     |
| electricity (mineralisation)                          | 8       | M€ a-1                              |
| heat (mineralisation)                                 | 1       | M€ a-1                              |
| Mineral (mineralisation)                              | 2       | M€ a-1                              |
| Additives (mineralisation)                            | 2       | M€ a-1                              |
| Process water (mineralisation)                        | 1       | M€ a-1                              |
| electricity (capture)                                 | 9       | M€ a-1                              |
| Steam (capture)                                       | 13      | M€ a-1                              |
| Cooling water (capture)                               | 1       | M€ a-1                              |
| MEA makeup (capture)                                  | 1       | M€ a-1                              |
| Electricity (clinker)                                 | 6       | M€ a-1                              |
| Coal (clinker)                                        | 7       | M€ a-1                              |
| Raw Meal (clinker)                                    | 4       | M€ a-1                              |
| Ammonia for SNR (clinker)                             | 0       | M€ a-1                              |
| Other (clinker)                                       | 1       | M€ a-1                              |
| Variable Opex                                         | 54      | M€ a-1                              |
| Specific                                              | 54      | € t <sup>-1</sup> <sub>cement</sub> |
| Specific variable opex w/o electricity and natgas     | 23      | € t <sup>-1</sup> <sub>cement</sub> |
| <b>Levelised costs of cement</b>                      |         |                                     |
| Levelised Costs of cement                             | 95      | € t <sup>-1</sup> <sub>cement</sub> |

**Table S21: Breakdown of costs for cement plant with CO<sub>2</sub> mineralisation, biofuel, CCS. Excluding transport of feedstock or CO<sub>2</sub>. Calculations based on Voldsund, et al.<sup>6</sup>, Strunge, et al.<sup>19</sup> and Telmo and Lousada<sup>55</sup>.**

| Cement plant with CO <sub>2</sub> mineralisation, biofuel, CCS |         | Unit                          |
|----------------------------------------------------------------|---------|-------------------------------|
| Capacity cement                                                | 1000000 | tcement a-1                   |
| Capacity CO <sub>2</sub> Mineralisation                        | 175806  | tCO <sub>2</sub> stored a-1   |
| Capacity CO <sub>2</sub> Capture                               | 535500  | tCO <sub>2</sub> captured a-1 |
| Capacity SCM                                                   | 300000  | tscm produced a-1             |
| Capacity SCM                                                   | 700000  | tclinker produced a-1         |
| <b>Capital costs</b>                                           |         |                               |
| TDC (incl. installation) Mineralisation plant                  | 45.18   | M€                            |
| TDC (incl. installation) Capture plant                         | 38.43   | M€                            |
| TDC total (mineralisation & capture)                           | 83.61   | M€                            |
| EPC (mineralisation & capture)                                 | 89.93   | M€                            |
| TPC (mineralisation & capture)                                 | 115.69  | M€                            |
| TPC Nth of a kind (mineralisation & capture)                   | 71.45   | M€                            |
| TCR Nth of a kind (mineralisation & capture)                   | 76.53   | M€                            |
| TCR Nth of a kind (clinker)                                    | 218.59  | M€                            |

|                                                   |        |                         |
|---------------------------------------------------|--------|-------------------------|
| TCR Nth of a kind total                           | 295.12 | M€                      |
| annualized TCR                                    | 25.45  | M€ a-1                  |
| <b>Fixed Opex</b>                                 |        |                         |
| Insurance and loc. Tax                            | 5.90   | M€ a-1                  |
| Maintenance                                       | 7.38   | M€ a-1                  |
| Labour Operating                                  | 0.58   | M€ a-1                  |
| Labour Admin                                      | 1.06   | M€ a-1                  |
| Fixed Opex                                        | 14.92  | M€ a-1                  |
| <b>Variable Opex</b>                              |        |                         |
| electricity (mineralisation)                      | 7.93   | M€ a-1                  |
| heat (mineralisation)                             | 1.20   | M€ a-1                  |
| Mineral (mineralisation)                          | 1.93   | M€ a-1                  |
| Additives (mineralisation)                        | 1.56   | M€ a-1                  |
| Process water (mineralisation)                    | 0.91   | M€ a-1                  |
| electricity (capture)                             | 8.62   | M€ a-1                  |
| Steam (capture)                                   | 13.39  | M€ a-1                  |
| Cooling water (capture)                           | 0.71   | M€ a-1                  |
| MEA makeup (capture)                              | 1.06   | M€ a-1                  |
| Electricity (clinker)                             | 5.73   | M€ a-1                  |
| Coal (clinker)                                    | 32.89  | M€ a-1                  |
| Raw Meal (clinker)                                | 3.50   | M€ a-1                  |
| Ammonia for SNR (clinker)                         | 0.45   | M€ a-1                  |
| Other (clinker)                                   | 0.77   | M€ a-1                  |
| Variable Opex                                     | 80.64  | M€ a-1                  |
| Specific                                          | 80.64  | € t <sup>1</sup> cement |
| Specific variable opex w/o electricity and natgas | 49.50  | € t <sup>1</sup> cement |
| <b>Levelised Costs of mineralisation</b>          |        |                         |
| Levelised Costs of cement                         | 121.01 | € t <sup>1</sup> cement |

**Table S22: Breakdown of costs for cement plant with calcined clay. Excluding transport of feedstock or CO<sub>2</sub>. Calculations based on Voldsund, et al.<sup>6</sup> and Sánchez Berriel, et al.<sup>28</sup>.**

| Cement plant with calcined clay                      |         | Unit                          |
|------------------------------------------------------|---------|-------------------------------|
| Capacity cement                                      | 1000000 | tcement a-1                   |
| Capacity CO <sub>2</sub> storage (in cement product) | 0       | tCO <sub>2</sub> stored a-1   |
| Capacity CO <sub>2</sub> capture                     | 0       | tCO <sub>2</sub> captured a-1 |
| Capacity Calcined clay                               | 300000  | tscm produced a-1             |
| Capacity Clinker                                     | 500000  | tclinker produced a-1         |
| <b>Capital costs</b>                                 |         |                               |
| TDC (incl. installation) Calcination plant           | 24.00   | M€                            |
| EPC (calcination)                                    | 3.36    | M€                            |
| TPC (calcination)                                    | 17.04   | M€                            |
| TPC Nth of a kind (calcination)                      | 10.52   | M€                            |
| TCR Nth of a kind (calcination)                      | 13.11   | M€                            |
| TCR Nth of a kind (clinker)                          | 218.59  | M€                            |
| TCR Nth of a kind total                              | 231.70  | M€                            |
| annualized TCR                                       | 19.98   | M€ a-1                        |
| <b>Fixed Opex</b>                                    |         |                               |
| Insurance and loc. Tax                               | 4.63    | M€ a-1                        |
| Maintenance                                          | 5.79    | M€ a-1                        |
| Labour Operating                                     | 0.58    | M€ a-1                        |
| Labour Admin                                         | 0.87    | M€ a-1                        |
| Fixed Opex                                           | 11.88   | M€ a-1                        |
| <b>Variable Opex</b>                                 |         |                               |
| Electricity (calcined clay)                          | 2.48    | M€ a-1                        |
| Heat (calcined clay)                                 | 2.50    | M€ a-1                        |
| Clay                                                 | 10.46   | M€ a-1                        |
| Gypsum                                               | 1.00    | M€ a-1                        |
| Limestone (as additive)                              | 4.69    | M€ a-1                        |
| Electricity (clinker)                                | 4.09    | M€ a-1                        |
| Coal (clinker)                                       | 4.70    | M€ a-1                        |
| Raw Meal (clinker)                                   | 2.50    | M€ a-1                        |
| Ammonia for SNR (clinker)                            | 0.32    | M€ a-1                        |
| Other (clinker)                                      | 0.55    | M€ a-1                        |
| Variable Opex                                        | 33.29   | M€ a-1                        |
| Specific                                             | 33.29   | € t <sup>1</sup> cement       |

|                                                   |       |                          |
|---------------------------------------------------|-------|--------------------------|
| Specific variable opex w/o electricity and natgas | 28.31 | € t <sup>-1</sup> cement |
| <b>Levelised Costs of mineralisation</b>          |       |                          |
| Levelised Costs of cement                         | 65.15 | € t <sup>-1</sup> cement |

**Table S23: Breakdown of costs for cement plant with calcined clay, biofuel. Excluding transport of feedstock or CO<sub>2</sub>. Calculations based on Voldsund, et al.<sup>6</sup>, Sánchez Berriel, et al.<sup>28</sup> and Telmo and Lousada<sup>55</sup>.**

| Cement plant with calcined clay, biofuel             |         | Unit                          |
|------------------------------------------------------|---------|-------------------------------|
| Capacity cement                                      | 1000000 | tcement a-1                   |
| Capacity CO <sub>2</sub> storage (in cement product) | 0       | tCO <sub>2</sub> stored a-1   |
| Capacity CO <sub>2</sub> capture                     | 0       | tCO <sub>2</sub> captured a-1 |
| Capacity Calcined clay                               | 300000  | tscm produced a-1             |
| Capacity Clinker                                     | 500000  | tclinker produced a-1         |
| <b>Capital costs</b>                                 |         |                               |
| TDC (incl. installation) Calcination plant           | 24.00   | M€                            |
| EPC (calcination)                                    | 3.36    | M€                            |
| TPC (calcination)                                    | 17.04   | M€                            |
| TPC Nth of a kind (calcination)                      | 10.52   | M€                            |
| TCR Nth of a kind (calcination)                      | 13.11   | M€                            |
| TCR Nth of a kind (clinker)                          | 218.59  | M€                            |
| TCR Nth of a kind total                              | 231.70  | M€                            |
| annualized TCR                                       | 19.98   | M€ a-1                        |
| <b>Fixed Opex</b>                                    |         |                               |
| Insurance and loc. Tax                               | 4.63    | M€ a-1                        |
| Maintenance                                          | 5.79    | M€ a-1                        |
| Labour Operating                                     | 0.58    | M€ a-1                        |
| Labour Admin                                         | 0.87    | M€ a-1                        |
| Fixed Opex                                           | 11.88   | M€ a-1                        |
| <b>Variable Opex</b>                                 |         |                               |
| Electricity (calcined clay)                          | 2.48    | M€ a-1                        |
| Biomass (calcined clay)                              | 12.49   | M€ a-1                        |
| Clay                                                 | 10.46   | M€ a-1                        |
| Gypsum                                               | 1.00    | M€ a-1                        |
| Limestone (as additive)                              | 4.69    | M€ a-1                        |
| Electricity (clinker)                                | 4.09    | M€ a-1                        |
| Biomass (clinker)                                    | 23.51   | M€ a-1                        |
| Raw Meal (clinker)                                   | 2.50    | M€ a-1                        |
| Ammonia for SNR (clinker)                            | 0.32    | M€ a-1                        |
| Other (clinker)                                      | 0.55    | M€ a-1                        |
| Variable Opex                                        | 62.09   | M€ a-1                        |
| Specific                                             | 62.09   | € t <sup>-1</sup> cement      |
| Specific variable opex w/o electricity and natgas    | 47.12   | € t <sup>-1</sup> cement      |
| <b>Levelised Costs of mineralisation</b>             |         |                               |
| Levelised Costs of cement                            | 93.95   | € t <sup>-1</sup> cement      |

**Table S24: Breakdown of costs for cement plant with calcined clay, CCS. Excluding transport of feedstock or CO<sub>2</sub>. Calculations based on Voldsund, et al.<sup>6</sup> and Sánchez Berriel, et al.<sup>28</sup>.**

| Cement plant with calcined clay, CCS                 |         | Unit                          |
|------------------------------------------------------|---------|-------------------------------|
| Capacity cement                                      | 1000000 | tcement a-1                   |
| Capacity CO <sub>2</sub> storage (in cement product) | 0       | tCO <sub>2</sub> stored a-1   |
| Capacity CO <sub>2</sub> capture                     | 382500  | tCO <sub>2</sub> captured a-1 |
| Capacity Calcined clay                               | 300000  | tscm produced a-1             |
| Capacity Clinker                                     | 500000  | tclinker produced a-1         |
| <b>Capital costs</b>                                 |         |                               |
| TDC (incl. installation) Calcination plant           | 24.00   | M€                            |
| TDC (incl. installation) Capture plant               | 31.40   | M€                            |
| TDC total (calcination & capture)                    | 55.40   | M€                            |

|                                                   |        |                          |
|---------------------------------------------------|--------|--------------------------|
| EPC (calcination & capture)                       | 58.76  | M€                       |
| TPC (calcination & capture)                       | 72.44  | M€                       |
| TPC Nth of a kind (calcination & capture)         | 44.74  | M€                       |
| TCR Nth of a kind (calcination & capture)         | 50.29  | M€                       |
| TCR Nth of a kind (clinker)                       | 218.59 | M€                       |
| TCR Nth of a kind total                           | 268.88 | M€                       |
| annualized TCR                                    | 23.19  | M€ a-1                   |
| <b>Fixed Opex</b>                                 |        |                          |
| Insurance and loc. Tax                            | 5.38   | M€ a-1                   |
| Maintenance                                       | 6.72   | M€ a-1                   |
| Labour Operating                                  | 0.58   | M€ a-1                   |
| Labour Admin                                      | 0.98   | M€ a-1                   |
| Fixed Opex                                        | 13.66  | M€ a-1                   |
| <b>Variable Opex</b>                              |        |                          |
| Electricity (calcined clay)                       | 2.48   | M€ a-1                   |
| Heat (calcined clay)                              | 2.50   | M€ a-1                   |
| Clay                                              | 10.46  | M€ a-1                   |
| Gypsum                                            | 1.00   | M€ a-1                   |
| Limestone (as additive)                           | 4.69   | M€ a-1                   |
| electricity (capture)                             | 8.49   | M€ a-1                   |
| Steam (capture)                                   | 9.56   | M€ a-1                   |
| Cooling water (capture)                           | 0.51   | M€ a-1                   |
| MEA makeup (capture)                              | 0.76   | M€ a-1                   |
| Electricity (clinker)                             | 4.09   | M€ a-1                   |
| Coal (clinker)                                    | 4.70   | M€ a-1                   |
| Raw Meal (clinker)                                | 2.50   | M€ a-1                   |
| Ammonia for SNR (clinker)                         | 0.32   | M€ a-1                   |
| Other (clinker)                                   | 0.55   | M€ a-1                   |
| Variable Opex                                     | 52.61  | M€ a-1                   |
| Specific                                          | 52.61  | € t <sup>-1</sup> cement |
| Specific variable opex w/o electricity and natgas | 29.58  | € t <sup>-1</sup> cement |
| <b>Levelised Costs of mineralisation</b>          |        |                          |
| Levelised Costs of cement                         | 89.46  | € t <sup>-1</sup> cement |

**Table S25: Breakdown of costs for cement plant with calcined clay, biofuel, CCS. Excluding transport of feed-stock or CO<sub>2</sub>. Calculations based on Voldsund, et al.<sup>6</sup>, Sánchez Berriel, et al.<sup>28</sup> and Telmo and Lousada<sup>55</sup>.**

| Cement plant with calcined clay, biofuel, CCS        |         | Unit                          |
|------------------------------------------------------|---------|-------------------------------|
| Capacity cement                                      | 1000000 | tcement a-1                   |
| Capacity CO <sub>2</sub> storage (in cement product) | 0       | tCO <sub>2</sub> stored a-1   |
| Capacity CO <sub>2</sub> capture                     | 382500  | tCO <sub>2</sub> captured a-1 |
| Capacity Calcined clay                               | 300000  | tscm produced a-1             |
| Capacity Clinker                                     | 500000  | tclinker produced a-1         |
| <b>Capital costs</b>                                 |         |                               |
| TDC (incl. installation) Calcination plant           | 24.00   | M€                            |
| TDC (incl. installation) Capture plant               | 31.40   | M€                            |
| TDC total (calcination & capture)                    | 55.40   | M€                            |
| EPC (calcination & capture)                          | 58.76   | M€                            |
| TPC (calcination & capture)                          | 72.44   | M€                            |
| TPC Nth of a kind (calcination & capture)            | 44.74   | M€                            |
| TCR Nth of a kind (calcination & capture)            | 50.29   | M€                            |
| TCR Nth of a kind (clinker)                          | 218.59  | M€                            |
| TCR Nth of a kind total                              | 268.88  | M€                            |
| annualized TCR                                       | 23.19   | M€ a-1                        |
| <b>Fixed Opex</b>                                    |         |                               |
| Insurance and loc. Tax                               | 5.38    | M€ a-1                        |
| Maintenance                                          | 6.72    | M€ a-1                        |
| Labour Operating                                     | 0.58    | M€ a-1                        |
| Labour Admin                                         | 0.98    | M€ a-1                        |
| Fixed Opex                                           | 13.66   | M€ a-1                        |
| <b>Variable Opex</b>                                 |         |                               |
| Electricity (calcined clay)                          | 2.48    | M€ a-1                        |
| Biomass (calcined clay)                              | 12.48   | M€ a-1                        |
| Clay                                                 | 10.46   | M€ a-1                        |
| Gypsum                                               | 1.00    | M€ a-1                        |
| Limestone (as additive)                              | 4.69    | M€ a-1                        |
| electricity (capture)                                | 15.77   | M€ a-1                        |
| Steam (capture)                                      | 9.56    | M€ a-1                        |
| Cooling water (capture)                              | 0.51    | M€ a-1                        |
| MEA makeup (capture)                                 | 0.76    | M€ a-1                        |
| Electricity (clinker)                                | 4.09    | M€ a-1                        |
| Biomass (clinker)                                    | 23.49   | M€ a-1                        |
| Raw Meal (clinker)                                   | 2.50    | M€ a-1                        |
| Ammonia for SNR (clinker)                            | 0.32    | M€ a-1                        |
| Other (clinker)                                      | 0.55    | M€ a-1                        |



|                                                   |        |                                    |
|---------------------------------------------------|--------|------------------------------------|
| Variable Opex                                     | 88.66  | M€ a-1                             |
| Specific                                          | 88.66  | € t <sup>1</sup> <sub>cement</sub> |
| Specific variable opex w/o electricity and natgas | 48.37  | € t <sup>1</sup> <sub>cement</sub> |
| <b>Levelised Costs of mineralisation</b>          |        |                                    |
| Levelised Costs of cement                         | 125.51 | € t <sup>1</sup> <sub>cement</sub> |

**Table S26: Results of non-collaborative analysis. For a cement plant assuming full capacity and a clinker factor of 1.**

| Germany                    |                                              |                              |                                                   |                                   |
|----------------------------|----------------------------------------------|------------------------------|---------------------------------------------------|-----------------------------------|
| Cement plant OID           | Parent Company                               | Chosen intervention          | Added cost in € t <sub>cement</sub> <sup>-1</sup> | Added costs in M€ a <sup>-1</sup> |
| CID4                       | Buzzi Unicem SpA                             | CCS_CALCINED_CLAY_CEMENT     | 1.5                                               | 1.5                               |
| CID5                       | Buzzi Unicem SpA                             | CCS_CALCINED_CLAY_CEMENT     | 2.2                                               | 4                                 |
| CID2                       | Buzzi Unicem SpA                             | CCS_CALCINED_CLAY_CEMENT     | 2.1                                               | 2.1                               |
| CID3                       | Buzzi Unicem SpA                             | CCS_CALCINED_CLAY_CEMENT     | 2.2                                               | 2.2                               |
| CID1                       | Buzzi Unicem SpA                             | CCS_CALCINED_CLAY_CEMENT     | 2.6                                               | 5.1                               |
| CID13                      | CEMEX SAB de CV                              | CCS_CALCINED_CLAY_CEMENT     | 4.7                                               | 6.2                               |
| CID10                      | CRH PLC                                      | CCS_CALCINED_CLAY_CEMENT     | 0.7                                               | 1.3                               |
| CID11                      | CRH PLC                                      | CCS_CALCINED_CLAY_CEMENT     | 9.1                                               | 9.1                               |
| CID20                      | HeidelbergCement AG                          | CCS_CALCINED_CLAY_CEMENT     | 1.7                                               | 1.7                               |
| CID23                      | HeidelbergCement AG                          | CCS_CALCINED_CLAY_CEMENT     | 2.3                                               | 2.3                               |
| CID17                      | HeidelbergCement AG                          | CCS_CALCINED_CLAY_CEMENT     | 3.5                                               | 3.5                               |
| CID22                      | HeidelbergCement AG                          | CCS_CALCINED_CLAY_CEMENT     | 3.0                                               | 3                                 |
| CID19                      | HeidelbergCement AG                          | CCS_CALCINED_CLAY_CEMENT     | 3.4                                               | 3.4                               |
| CID18                      | HeidelbergCement AG                          | CCS_CALCINED_CLAY_CEMENT     | 3.1                                               | 2.1                               |
| CID16                      | HeidelbergCement AG                          | CCS_CALCINED_CLAY_CEMENT     | 3.6                                               | 3.6                               |
| CID21                      | HeidelbergCement AG                          | CCS_CALCINED_CLAY_CEMENT     | 5.8                                               | 8.1                               |
| CID26                      | Hugo Miebach GmbH                            | CCS_CALCINED_CLAY_CEMENT     | 9.1                                               | 8.2                               |
| CID29                      | LafargeHolcim Ltd                            | CCS_CALCINED_CLAY_CEMENT     | 3.2                                               | 3.2                               |
| CID30                      | LafargeHolcim Ltd                            | CCS_CALCINED_CLAY_CEMENT     | 6.8                                               | 6.8                               |
| CID28                      | LafargeHolcim Ltd                            | CCS_CALCINED_CLAY_CEMENT     | 2.7                                               | 2.5                               |
| CID27                      | LafargeHolcim Ltd                            | CALCINED_CLAY_CEMENT         | 4.9                                               | 5.7                               |
| CID35                      | Maerker Zement GmbH                          | CCS_CALCINED_CLAY_CEMENT     | 11.9                                              | 11.9                              |
| CID37                      | Phoenix Zementwerke Krogbeumker GmbH & Co KG | CCS_CALCINED_CLAY_CEMENT     | 7.1                                               | 7.1                               |
| CID39                      | Rohrdorfer Zementwerke                       | CALCINED_CLAY_CEMENT         | 1.9                                               | 1.3                               |
| CID43                      | SCHWENK Zement KG                            | CCS_CALCINED_CLAY_CEMENT     | 3.7                                               | 3.5                               |
| CID40                      | SCHWENK Zement KG                            | CCS_CALCINED_CLAY_CEMENT     | 4.6                                               | 7.7                               |
| CID42                      | SCHWENK Zement KG                            | CCS_CALCINED_CLAY_CEMENT     | 5.1                                               | 4.8                               |
| CID41                      | SCHWENK Zement KG                            | CCS_CALCINED_CLAY_CEMENT     | 5.6                                               | 9.5                               |
| CID45                      | Solnhofer Portland-Zementwerke GmbH & Co KG  | CCS_CALCINED_CLAY_CEMENT     | 12.4                                              | 12.4                              |
| CID46                      | Spenner & GmbH Co KG                         | CCS_CALCINED_CLAY_CEMENT     | 7.4                                               | 7.4                               |
| CID9                       | thomas Beteiligungen GmbH                    | CCS_CALCINED_CLAY_CEMENT     | 7.4                                               | 7.5                               |
|                            |                                              |                              | Sum:                                              | 158.7                             |
| United Kingdom and Ireland |                                              |                              |                                                   |                                   |
| Cement plant OID           | Parent Company                               | Chosen intervention          | Added cost in € t <sub>cement</sub> <sup>-1</sup> | Added costs in M€ a <sup>-1</sup> |
| CID53                      | Breedon Group PLC                            | CCS_CALCINED_CLAY_CEMENT     | 10.2                                              | 11.3                              |
| CID71                      | Breedon Group PLC                            | CALCINED_CLAY_BIOMASS_CEMENT | 7.8                                               | 4                                 |
| CID58                      | CEMEX SAB de CV                              | CCS_CALCINED_CLAY_CEMENT     | 0.2                                               | 0.1                               |
| CID59                      | CEMEX SAB de CV                              | CCS_CALCINED_CLAY_CEMENT     | 12.0                                              | 15.9                              |
| CID55                      | CRH PLC                                      | CCS_CALCINED_CLAY_CEMENT     | 8.5                                               | 6.2                               |
| CID73                      | CRH PLC                                      | CCS_CALCINED_CLAY_CEMENT     | 4.2                                               | 8.8                               |
| CID54                      | CRH PLC                                      | CALCINED_CLAY_CEMENT         | 5.5                                               | 2                                 |
| CID72                      | CRH PLC                                      | CALCINED_CLAY_BIOMASS_CEMENT | 1.0                                               | 0.6                               |
| CID56                      | CRH PLC                                      | CCS_CALCINED_CLAY_CEMENT     | 4.6                                               | 3.4                               |
| CID62                      | HeidelbergCement AG                          | CCS_CALCINED_CLAY_CEMENT     | 3.2                                               | 2.2                               |
| CID61                      | HeidelbergCement AG                          | CCS_CALCINED_CLAY_CEMENT     | 8.0                                               | 7.7                               |
| CID63                      | HeidelbergCement AG                          | CCS_CALCINED_CLAY_CEMENT     | 3.8                                               | 6                                 |
| CID68                      | LafargeHolcim Ltd                            | CCS_CALCINED_CLAY_CEMENT     | 14.8                                              | 10.5                              |
| CID67                      | LafargeHolcim Ltd                            | CALCINED_CLAY_CEMENT         | 2.4                                               | 0.9                               |

|       |                  |                          |      |     |
|-------|------------------|--------------------------|------|-----|
| CID74 | Mannok Build Ltd | CCS_CALCINED_CLAY_CEMENT | 2.1  | 4.9 |
| CID70 | Mannok Build Ltd | CCS_CEMENT               | 11.0 | 9.5 |
|       |                  |                          | Sum: | 94  |

**Portugal and Spain**

| <b>Cement plant<br/>OID</b> | <b>Parent Company</b>                     | <b>Chosen intervention</b> | <b>Added cost in €<br/>tcement-<br/>1</b> | <b>Added costs<br/>in M€<br/>a-1</b> |
|-----------------------------|-------------------------------------------|----------------------------|-------------------------------------------|--------------------------------------|
| CID75                       | AG Cementos Balboa SA                     | CCS_CALCINED_CLAY_CEMENT   | 4.9                                       | 6.4                                  |
| CID81                       | Cementos Portland Valderrivas SA          | CCS_CALCINED_CLAY_CEMENT   | 2.0                                       | 3.8                                  |
| CID77                       | Cementos Portland Valderrivas SA          | CCS_CALCINED_CLAY_CEMENT   | 3.7                                       | 7.7                                  |
| CID80                       | Cementos Portland Valderrivas SA          | CCS_CALCINED_CLAY_CEMENT   | -1.2                                      | -1.7                                 |
| CID79                       | Cementos Portland Valderrivas SA          | CCS_CALCINED_CLAY_CEMENT   | 5.5                                       | 4.5                                  |
| CID78                       | Cementos Portland Valderrivas SA          | CCS_CALCINED_CLAY_CEMENT   | 3.0                                       | 3.1                                  |
| CID82                       | CEMEX SAB de CV                           | CCS_CALCINED_CLAY_CEMENT   | -0.9                                      | -1.1                                 |
| CID84                       | CEMEX SAB de CV                           | CCS_CALCINED_CLAY_CEMENT   | 0.1                                       | 0.2                                  |
| CID85                       | CEMEX SAB de CV                           | CCS_CALCINED_CLAY_CEMENT   | 4.3                                       | 9.1                                  |
| CID86                       | CEMEX SAB de CV                           | CCS_CALCINED_CLAY_CEMENT   | 0.4                                       | 0.4                                  |
| CID83                       | CEMEX SAB de CV                           | CCS_CALCINED_CLAY_CEMENT   | 9.0                                       | 15.1                                 |
| CID89                       | Corporacion Masaveu SA                    | CCS_CALCINED_CLAY_CEMENT   | 3.1                                       | 4.1                                  |
| CID87                       | Corporacion Masaveu SA                    | CCS_CALCINED_CLAY_CEMENT   | 3.1                                       | 4.5                                  |
| CID88                       | Corporacion Masaveu SA                    | CCS_CALCINED_CLAY_CEMENT   | 3.1                                       | 5.9                                  |
| CID76                       | CRH PLC                                   | CALCINED_CLAY_CEMENT       | 8.0                                       | 6.7                                  |
| CID90                       | HeidelbergCement AG                       | CCS_CALCINED_CLAY_CEMENT   | 5.8                                       | 7.5                                  |
| CID92                       | HeidelbergCement AG                       | CCS_CALCINED_CLAY_CEMENT   | 5.8                                       | 12.2                                 |
| CID91                       | HeidelbergCement AG                       | CCS_CALCINED_CLAY_CEMENT   | 5.6                                       | 7.3                                  |
| CID104                      | InterCement Participacoes SA              | CCS_CALCINED_CLAY_CEMENT   | 0.3                                       | 0.4                                  |
| CID103                      | InterCement Participacoes SA              | CCS_CALCINED_CLAY_CEMENT   | 0.8                                       | 1                                    |
| CID105                      | InterCement Participacoes SA              | CCS_CALCINED_CLAY_CEMENT   | 2.1                                       | 3.1                                  |
| CID94                       | LafargeHolcim Ltd                         | CCS_CALCINED_CLAY_CEMENT   | 0.0                                       | -0.1                                 |
| CID97                       | LafargeHolcim Ltd                         | CCS_CALCINED_CLAY_CEMENT   | 3.2                                       | 2.8                                  |
| CID93                       | LafargeHolcim Ltd                         | CCS_CALCINED_CLAY_CEMENT   | -3.2                                      | -4.5                                 |
| CID95                       | LafargeHolcim Ltd                         | CCS_CALCINED_CLAY_CEMENT   | -1.0                                      | -1.4                                 |
| CID96                       | LafargeHolcim Ltd                         | CCS_CALCINED_CLAY_CEMENT   | 6.9                                       | 16                                   |
| CID108                      | Secil Companhia Geral de Cal e Cimento SA | CCS_CALCINED_CLAY_CEMENT   | 1.0                                       | 1.3                                  |
| CID106                      | Secil Companhia Geral de Cal e Cimento SA | CCS_CALCINED_CLAY_CEMENT   | 0.6                                       | 0.4                                  |
| CID107                      | Secil Companhia Geral de Cal e Cimento SA | CCS_CALCINED_CLAY_CEMENT   | 0.6                                       | 1.2                                  |
| CID102                      |                                           | CALCINED_CLAY_CEMENT       | 3.2                                       | 4.2                                  |
| CID100                      | Votorantim SA                             | CCS_CALCINED_CLAY_CEMENT   | 3.9                                       | 5.4                                  |
| CID99                       | Votorantim SA                             | CCS_CALCINED_CLAY_CEMENT   | 3.1                                       | 4.1                                  |
| CID101                      | Votorantim SA                             | CCS_CALCINED_CLAY_CEMENT   | 3.9                                       | 3.8                                  |
| CID98                       | Votorantim SA                             | CCS_CALCINED_CLAY_CEMENT   | 3.9                                       | 3.8                                  |
|                             |                                           |                            | Sum:                                      | 116.5                                |





**Table S32: Results Sensitivity Analysis: selected interventions for cement plants in Portugal and Spain without calcined clay.**

| Plant ID | Min bio                    | Max bio                    | Min olivine                | Max olivine                | Min energy                 | Max energy                 |
|----------|----------------------------|----------------------------|----------------------------|----------------------------|----------------------------|----------------------------|
| CID108   | CCS_MINERAL_CEMENT         | CCS_MINERAL_CEMENT         | CCS_MINERAL_CEMENT         | CCS_MINERAL_CEMENT         | CCS_MINERAL_CEMENT         | CCS_MINERAL_CEMENT         |
| CID107   | CCS_MINERAL_CEMENT         | CCS_MINERAL_CEMENT         | CCS_MINERAL_CEMENT         | CCS_MINERAL_CEMENT         | CCS_MINERAL_CEMENT         | CCS_MINERAL_CEMENT         |
| CID106   | CCS_CEMENT                 | CCS_CEMENT                 | CCS_CEMENT                 | CCS_CEMENT                 | CCS_CEMENT                 | CCS_CEMENT                 |
| CID105   | CCS_MINERAL_CEMENT         | CCS_MINERAL_CEMENT         | CCS_MINERAL_CEMENT         | CCS_MINERAL_CEMENT         | CCS_MINERAL_CEMENT         | CCS_MINERAL_CEMENT         |
| CID104   | CCS_CEMENT                 | CCS_CEMENT                 | CCS_CEMENT                 | CCS_CEMENT                 | CCS_CEMENT                 | CCS_CEMENT                 |
| CID103   | CCS_MINERAL_CEMENT         | CCS_MINERAL_CEMENT         | CCS_MINERAL_CEMENT         | CCS_MINERAL_CEMENT         | CCS_MINERAL_CEMENT         | CCS_MINERAL_CEMENT         |
| CID102   | CCS_MINERAL_CEMENT         | CCS_MINERAL_CEMENT         | CCS_MINERAL_CEMENT         | CCS_MINERAL_CEMENT         | CCS_MINERAL_CEMENT         | CCS_MINERAL_CEMENT         |
| CID101   | CCS_CEMENT                 | CCS_CEMENT                 | CCS_CEMENT                 | CCS_CEMENT                 | CCS_CEMENT                 | CCS_CEMENT                 |
| CID100   | CCS_MINERAL_CEMENT         | CCS_MINERAL_CEMENT         | CCS_MINERAL_CEMENT         | CCS_MINERAL_CEMENT         | CCS_MINERAL_CEMENT         | CCS_MINERAL_CEMENT         |
| CID99    | CCS_CEMENT                 | CCS_CEMENT                 | CCS_CEMENT                 | CCS_CEMENT                 | CCS_CEMENT                 | CCS_CEMENT                 |
| CID98    | CCS_CEMENT                 | CCS_CEMENT                 | CCS_CEMENT                 | CCS_CEMENT                 | CCS_CEMENT                 | CCS_CEMENT                 |
| CID97    | CCS_CEMENT                 | CCS_CEMENT                 | CCS_CEMENT                 | CCS_CEMENT                 | CCS_CEMENT                 | CCS_CEMENT                 |
| CID96    | CCS_MINERAL_CEMENT         | CCS_MINERAL_CEMENT         | CCS_MINERAL_CEMENT         | CCS_MINERAL_CEMENT         | CCS_MINERAL_CEMENT         | CCS_MINERAL_CEMENT         |
| CID95    | CCS_CEMENT                 | CCS_CEMENT                 | CCS_CEMENT                 | CCS_CEMENT                 | CCS_CEMENT                 | CCS_CEMENT                 |
| CID94    | CCS_MINERAL_CEMENT         | CCS_MINERAL_CEMENT         | CCS_MINERAL_CEMENT         | CCS_MINERAL_CEMENT         | CCS_MINERAL_CEMENT         | CCS_MINERAL_CEMENT         |
| CID93    | CCS_MINERAL_CEMENT         | CCS_MINERAL_CEMENT         | CCS_MINERAL_CEMENT         | CCS_MINERAL_CEMENT         | CCS_MINERAL_CEMENT         | CCS_MINERAL_CEMENT         |
| CID92    | CCS_MINERAL_CEMENT         | CCS_MINERAL_CEMENT         | CCS_MINERAL_CEMENT         | CCS_MINERAL_CEMENT         | CCS_MINERAL_CEMENT         | CCS_MINERAL_CEMENT         |
| CID91    | CCS_MINERAL_CEMENT         | CCS_MINERAL_CEMENT         | CCS_MINERAL_CEMENT         | CCS_MINERAL_CEMENT         | CCS_MINERAL_CEMENT         | CCS_MINERAL_CEMENT         |
| CID90    | CCS_MINERAL_CEMENT         | CCS_MINERAL_CEMENT         | CCS_MINERAL_CEMENT         | CCS_MINERAL_CEMENT         | CCS_MINERAL_CEMENT         | CCS_MINERAL_CEMENT         |
| CID89    | CCS_MINERAL_CEMENT         | CCS_MINERAL_CEMENT         | CCS_MINERAL_CEMENT         | CCS_MINERAL_CEMENT         | CCS_MINERAL_CEMENT         | CCS_MINERAL_CEMENT         |
| CID88    | CCS_MINERAL_CEMENT         | CCS_MINERAL_CEMENT         | CCS_MINERAL_CEMENT         | CCS_MINERAL_CEMENT         | CCS_MINERAL_CEMENT         | CCS_MINERAL_CEMENT         |
| CID87    | CCS_BIOMASS_MINERAL_CEMENT | CCS_BIOMASS_MINERAL_CEMENT | CCS_BIOMASS_MINERAL_CEMENT | CCS_BIOMASS_MINERAL_CEMENT | CCS_BIOMASS_MINERAL_CEMENT | CCS_BIOMASS_MINERAL_CEMENT |
| CID86    | CCS_CEMENT                 | CCS_CEMENT                 | CCS_CEMENT                 | CCS_CEMENT                 | CCS_CEMENT                 | CCS_CEMENT                 |
| CID85    | CCS_CEMENT                 | CCS_CEMENT                 | CCS_CEMENT                 | CCS_CEMENT                 | CCS_CEMENT                 | CCS_CEMENT                 |
| CID84    | CCS_CEMENT                 | CCS_CEMENT                 | CCS_CEMENT                 | CCS_CEMENT                 | CCS_CEMENT                 | CCS_CEMENT                 |
| CID83    | CCS_MINERAL_CEMENT         | CCS_MINERAL_CEMENT         | CCS_MINERAL_CEMENT         | CCS_MINERAL_CEMENT         | CCS_MINERAL_CEMENT         | CCS_MINERAL_CEMENT         |
| CID82    | CCS_CEMENT                 | CCS_CEMENT                 | CCS_CEMENT                 | CCS_CEMENT                 | CCS_CEMENT                 | CCS_CEMENT                 |
| CID81    | CCS_MINERAL_CEMENT         | CCS_MINERAL_CEMENT         | CCS_MINERAL_CEMENT         | CCS_MINERAL_CEMENT         | CCS_MINERAL_CEMENT         | CCS_MINERAL_CEMENT         |
| CID80    | CCS_CEMENT                 | CCS_CEMENT                 | CCS_CEMENT                 | CCS_CEMENT                 | CCS_CEMENT                 | CCS_CEMENT                 |
| CID79    | CCS_CEMENT                 | CCS_CEMENT                 | CCS_CEMENT                 | CCS_CEMENT                 | CCS_CEMENT                 | CCS_CEMENT                 |
| CID78    | CCS_CEMENT                 | CCS_CEMENT                 | CCS_CEMENT                 | CCS_CEMENT                 | CCS_CEMENT                 | CCS_CEMENT                 |
| CID77    | CCS_MINERAL_CEMENT         | CCS_MINERAL_CEMENT         | CCS_MINERAL_CEMENT         | CCS_MINERAL_CEMENT         | CCS_MINERAL_CEMENT         | CCS_MINERAL_CEMENT         |
| CID76    | CCS_BIOMASS_MINERAL_CEMENT | CCS_BIOMASS_MINERAL_CEMENT | CCS_BIOMASS_MINERAL_CEMENT | CCS_BIOMASS_MINERAL_CEMENT | CCS_BIOMASS_MINERAL_CEMENT | CCS_BIOMASS_MINERAL_CEMENT |
| CID75    | CCS_CEMENT                 | CCS_CEMENT                 | CCS_CEMENT                 | CCS_CEMENT                 | CCS_CEMENT                 | CCS_CEMENT                 |

**Table S33: List of all considered grid points.** Note Ports have been excluded from this table due to the large amount of points. Cement plant capacities and locations taken from Tkachenko, et al.<sup>78</sup>. Tkachenko, et al.<sup>78</sup>. \*no capacity data was available. Here an average European cement plant was assumed. Storage sites taken from European Commission - Joint Research Centre<sup>39</sup> and Neele, et al.<sup>42</sup>. \*\* storage capacity assumed due to lack of data. Olivine-bearing rock locations taken from Kremer, et al.<sup>18</sup>. Kaolinite clay site locations taken from Dill<sup>44</sup>, Galán, et al.<sup>45</sup> and British Geological Survey<sup>46</sup>.

| Type         | Country | VID   | Latitude  | Longitude | Capacity Mt <sub>cement</sub> a <sup>-1</sup> |
|--------------|---------|-------|-----------|-----------|-----------------------------------------------|
| Cement plant | GER     | CID1  | 51.364109 | 10.48     | 2.61                                          |
| Cement plant | GER     | CID2  | 51.62267  | 8.50      | 1.3*                                          |
| Cement plant | GER     | CID3  | 49.602402 | 8.04      | 1.3*                                          |
| Cement plant | GER     | CID4  | 52.17459  | 7.89      | 1.41                                          |
| Cement plant | GER     | CID5  | 50.032201 | 8.26      | 2.43                                          |
| Cement plant | GER     | CID9  | 51.599521 | 8.34      | 1.3*                                          |
| Cement plant | GER     | CID10 | 51.270124 | 11.66     | 2.30                                          |
| Cement plant | GER     | CID11 | 49.016926 | 8.61      | 1.3*                                          |
| Cement plant | GER     | CID13 | 52.489222 | 13.84     | 1.79                                          |
| Cement plant | GER     | CID16 | 49.213555 | 12.03     | 1.3*                                          |
| Cement plant | GER     | CID17 | 51.857225 | 8.03      | 1.3*                                          |
| Cement plant | GER     | CID18 | 52.374756 | 9.88      | 0.90                                          |
| Cement plant | GER     | CID19 | 49.357624 | 8.69      | 1.3*                                          |
| Cement plant | GER     | CID20 | 51.698479 | 8.75      | 1.3*                                          |
| Cement plant | GER     | CID21 | 48.368982 | 9.74      | 1.90                                          |
| Cement plant | GER     | CID22 | 49.808084 | 9.62      | 1.3*                                          |
| Cement plant | GER     | CID23 | 51.618256 | 8.51      | 1.3*                                          |
| Cement plant | GER     | CID26 | 51.595161 | 8.34      | 1.21                                          |
| Cement plant | GER     | CID27 | 48.227348 | 8.78      | 1.60                                          |
| Cement plant | GER     | CID28 | 53.875099 | 9.58      | 1.29                                          |
| Cement plant | GER     | CID29 | 52.353363 | 9.89      | 1.3*                                          |
| Cement plant | GER     | CID30 | 51.765425 | 8.06      | 1.3*                                          |
| Cement plant | GER     | CID35 | 48.774206 | 10.70     | 1.3*                                          |
| Cement plant | GER     | CID37 | 51.759234 | 8.07      | 1.3*                                          |
| Cement plant | GER     | CID39 | 47.791873 | 12.18     | 0.97                                          |
| Cement plant | GER     | CID40 | 51.813271 | 11.75     | 2.26                                          |
| Cement plant | GER     | CID41 | 48.333264 | 9.73      | 2.29                                          |

|               |         |        |             |           |                                 |
|---------------|---------|--------|-------------|-----------|---------------------------------|
| Cement plant  | GER     | CID42  | 48.652954   | 10.16     | 1.28                            |
| Cement plant  | GER     | CID43  | 49.954669   | 9.77      | 1.31                            |
| Cement plant  | GER     | CID45  | 48.884764   | 11.00     | 1.3*                            |
| Cement plant  | GER     | CID46  | 51.602063   | 8.34      | 1.3*                            |
| Cement plant  | UK      | CID53  | 53.337916   | -1.75     | 1.50                            |
| Cement plant  | UK      | CID54  | 51.397546   | -3.39     | 0.50                            |
| Cement plant  | UK      | CID55  | 53.265267   | -1.85     | 1.00                            |
| Cement plant  | UK      | CID56  | 55.979125   | -2.47     | 1.00                            |
| Cement plant  | UK      | CID58  | 53.675822   | -0.53     | 0.70                            |
| Cement plant  | UK      | CID59  | 52.377293   | -1.29     | 1.80                            |
| Cement plant  | UK      | CID61  | 53.888913   | -2.38     | 1.30                            |
| Cement plant  | UK      | CID62  | 53.152678   | -3.06     | 0.91                            |
| Cement plant  | UK      | CID63  | 52.640356   | -0.55     | 2.16                            |
| Cement plant  | UK      | CID67  | 54.618105   | -6.77     | 0.48                            |
| Cement plant  | UK      | CID68  | 53.044003   | -1.88     | 0.96                            |
| Cement plant  | UK      | CID70  | 54.143487   | -7.57     | 1.17                            |
| Cement plant  | IRE     | CID71  | 53.432118   | -7.14     | 0.70                            |
| Cement plant  | IRE     | CID72  | 52.641364   | -8.69     | 0.80                            |
| Cement plant  | IRE     | CID73  | 53.684307   | -6.39     | 2.80                            |
| Cement plant  | IRE     | CID74  | 54.130891   | -7.58     | 1.13                            |
| Cement plant  | ESP     | CID75  | 38.3792     | -6.48     | 1.3*                            |
| Cement plant  | ESP     | CID76  | 43.206524   | -2.77     | 0.83                            |
| Cement plant  | ESP     | CID77  | 42.874825   | -4.16     | 2.90                            |
| Cement plant  | ESP     | CID78  | 40.244961   | -3.47     | 1.06                            |
| Cement plant  | ESP     | CID79  | 42.882983   | -2.19     | 0.82                            |
| Cement plant  | ESP     | CID80  | 41.941676   | -4.47     | 1.45                            |
| Cement plant  | ESP     | CID81  | 37.359736   | -5.87     | 1.87                            |
| Cement plant  | ESP     | CID82  | 39.436556   | -0.78     | 1.3*                            |
| Cement plant  | ESP     | CID83  | 41.475476   | -1.49     | 1.68                            |
| Cement plant  | ESP     | CID84  | 38.378014   | -0.54     | 1.53                            |
| Cement plant  | ESP     | CID85  | 40.576824   | 0.54      | 2.87                            |
| Cement plant  | ESP     | CID86  | 39.934332   | -3.74     | 0.94                            |
| Cement plant  | ESP     | CID87  | 43.560582   | -5.72     | 1.43                            |
| Cement plant  | ESP     | CID88  | 42.798654   | -5.62     | 1.87                            |
| Cement plant  | ESP     | CID89  | 43.33011    | -5.78     | 1.3*                            |
| Cement plant  | ESP     | CID90  | 43.204824   | -2.90     | 1.3*                            |
| Cement plant  | ESP     | CID91  | 36.714681   | -4.33     | 1.3*                            |
| Cement plant  | ESP     | CID92  | 43.285684   | -2.00     | 2.87                            |
| Cement plant  | ESP     | CID93  | 36.966885   | -1.90     | 1.39                            |
| Cement plant  | ESP     | CID94  | 36.618249   | -6.07     | 2.92                            |
| Cement plant  | ESP     | CID95  | 40.009935   | -3.90     | 1.3*                            |
| Cement plant  | ESP     | CID96  | 41.474698   | 2.18      | 2.31                            |
| Cement plant  | ESP     | CID97  | 39.663613   | -0.25     | 0.88                            |
| Cement plant  | ESP     | CID98  | 37.902032   | -4.76     | 0.98                            |
| Cement plant  | ESP     | CID99  | 37.359766   | -6.67     | 1.3*                            |
| Cement plant  | ESP     | CID100 | 42.717483   | -7.45     | 1.37                            |
| Cement plant  | ESP     | CID101 | 42.553519   | -6.77     | 0.97                            |
| Cement plant  | ESP     | CID102 | 41.402821   | 2.05      | 1.3*                            |
| Cement plant  | PT      | CID103 | 38.922169   | -9.01     | 1.18                            |
| Cement plant  | PT      | CID104 | 37.135933   | -8.10     | 1.3*                            |
| Cement plant  | PT      | CID105 | 40.289074   | -8.42     | 1.50                            |
| Cement plant  | PT      | CID106 | 39.685773   | -8.91     | 0.62                            |
| Cement plant  | PT      | CID107 | 39.655677   | -8.99     | 2.00                            |
| Cement plant  | PT      | CID108 | 38.501466   | -8.94     | 1.3*                            |
| Type          | Country | VID    | Latitude    | Longitude | Mean capacity MtCO <sub>2</sub> |
| Storage sites | UK      | SID1   | 54.01255983 | 1.27      | 13293.91                        |
| Storage sites | UK      | SID2   | 53.41040519 | 1.66      | 0.00                            |
| Storage sites | UK      | SID3   | 60.26116908 | 1.79      | 370.44                          |
| Storage sites | UK      | SID4   | 59.74385612 | 1.39      | 12220.08                        |
| Storage sites | UK      | SID5   | 57.23100117 | 0.93      | 339.07                          |
| Storage sites | UK      | SID6   | 57.40650906 | 1.33      | 26132.05                        |
| Storage sites | UK      | SID7   | 57.65877357 | 0.48      | 372.18                          |
| Storage sites | UK      | SID8   | 58.50572514 | 0.13      | 14613.75                        |
| Storage sites | UK      | SID9   | 58.88268013 | 1.24      | 427.28                          |

|               |    |       |             |       |          |
|---------------|----|-------|-------------|-------|----------|
| Storage sites | UK | SID10 | 59.86255188 | 2.00  | 25.27    |
| Storage sites | UK | SID11 | 58.84081626 | 1.43  | 66.15    |
| Storage sites | UK | SID12 | 59.98601885 | 1.86  | 221.29   |
| Storage sites | UK | SID13 | 58.44588928 | 1.33  | 0.00     |
| Storage sites | UK | SID14 | 58.75345896 | 1.36  | 0.00     |
| Storage sites | UK | SID15 | 59.03576844 | 1.49  | 6.17     |
| Storage sites | UK | SID16 | 53.84996599 | -3.59 | 1775.02  |
| Storage sites | UK | SID17 | 54.61267195 | -4.02 | 339.42   |
| Storage sites | UK | SID18 | 53.97813606 | -4.32 | 0.00     |
| Storage sites | UK | SID19 | 58.21578367 | 0.80  | 4753.13  |
| Storage sites | UK | SID20 | 58.25739527 | 1.30  | 30.49    |
| Storage sites | UK | SID21 | 53.64289201 | -3.50 | 2141.46  |
| Storage sites | UK | SID22 | 54.18761158 | -4.00 | 1220.52  |
| Storage sites | UK | SID23 | 53.86033527 | -3.75 | 0.76     |
| Storage sites | UK | SID24 | 50.48018176 | -2.12 | 1265.95  |
| Storage sites | UK | SID25 | 54.04912548 | -3.78 | 11099.42 |
| Storage sites | UK | SID26 | 53.82349023 | 1.12  | 5466.79  |
| Storage sites | UK | SID27 | 50.43990603 | -2.36 | 393.79   |
| Storage sites | UK | SID28 | 55.61560804 | 2.59  | 101.75   |
| Storage sites | UK | SID29 | 59.54083262 | 1.44  | 27.36    |
| Storage sites | UK | SID30 | 59.76576328 | 1.65  | 17.52    |
| Storage sites | UK | SID31 | 58.2773108  | -2.09 | 0.00     |
| Storage sites | UK | SID32 | 58.17111368 | -2.21 | 0.00     |
| Storage sites | UK | SID33 | 59.57500693 | 1.68  | 102.53   |
| Storage sites | UK | SID34 | 61.02533292 | 1.38  | 592.23   |
| Storage sites | UK | SID35 | 52.90913671 | 1.71  | 435.46   |
| Storage sites | UK | SID36 | 58.02051318 | -2.88 | 0.00     |
| Storage sites | UK | SID37 | 58.71720687 | 1.37  | 0.00     |
| Storage sites | UK | SID38 | 56.99690677 | 1.33  | 0.00     |
| Storage sites | UK | SID39 | 59.46596161 | 1.45  | 0.00     |
| Storage sites | UK | SID40 | 58.23877412 | -2.19 | 0.00     |
| Storage sites | UK | SID41 | 56.67399802 | -1.62 | 0.00     |
| Storage sites | UK | SID42 | 58.59035816 | 1.47  | 0.00     |
| Storage sites | UK | SID43 | 59.57469003 | 1.72  | 0.00     |
| Storage sites | UK | SID44 | 61.04513353 | -0.04 | 0.00     |
| Storage sites | UK | SID45 | 58.20706176 | -2.66 | 0.00     |
| Storage sites | UK | SID46 | 56.95215819 | 1.58  | 13693.05 |
| Storage sites | UK | SID47 | 58.37359571 | 1.26  | 8.67     |
| Storage sites | UK | SID48 | 58.48189735 | 1.29  | 18.02    |
| Storage sites | UK | SID49 | 57.68460262 | 0.28  | 0.00     |
| Storage sites | UK | SID50 | 56.72668691 | -1.61 | 12.50    |
| Storage sites | UK | SID51 | 53.83690733 | 1.10  | 0.00     |
| Storage sites | UK | SID52 | 54.96733408 | -1.26 | 0.00     |
| Storage sites | UK | SID53 | 54.38312363 | -0.11 | 0.00     |
| Storage sites | UK | SID54 | 58.90608782 | 0.02  | 604.04   |
| Storage sites | UK | SID55 | 57.71737166 | -0.19 | 79.02    |
| Storage sites | UK | SID56 | 58.5050536  | -0.27 | 233.24   |
| Storage sites | UK | SID57 | 56.75116877 | 1.03  | 277.51   |
| Storage sites | UK | SID58 | 57.11599256 | 0.46  | 206.11   |
| Storage sites | UK | SID59 | 52.52674352 | 1.95  | 0.00     |
| Storage sites | UK | SID60 | 58.58919791 | -0.11 | 27.65    |
| Storage sites | UK | SID61 | 53.21527443 | 1.01  | 0.00     |
| Storage sites | UK | SID62 | 52.98999616 | 2.97  | 0.00     |
| Storage sites | UK | SID63 | 52.50611395 | 2.84  | 0.00     |
| Storage sites | UK | SID64 | 52.7563253  | 2.10  | 431.23   |
| Storage sites | UK | SID65 | 53.41221502 | 1.95  | 193.11   |
| Storage sites | UK | SID66 | 53.91525654 | 1.28  | 0.00     |
| Storage sites | UK | SID67 | 54.02117059 | 2.29  | 0.00     |
| Storage sites | UK | SID68 | 57.90680972 | 0.51  | 21852.40 |
| Storage sites | UK | SID69 | 58.78460253 | 0.12  | 8036.79  |
| Storage sites | UK | SID70 | 59.26360488 | 1.26  | 1389.15  |
| Storage sites | UK | SID71 | 60.80170559 | 1.35  | 16360.99 |
| Storage sites | UK | SID72 | 61.65806026 | 1.37  | 0.00     |
| Storage sites | UK | SID73 | 58.19647436 | -2.24 | 209.13   |

|               |     |        |             |       |          |
|---------------|-----|--------|-------------|-------|----------|
| Storage sites | UK  | SID74  | 57.43753242 | 1.45  | 8845.39  |
| Storage sites | UK  | SID75  | 58.13984376 | -2.68 | 736.10   |
| Storage sites | UK  | SID76  | 58.57685962 | 1.31  | 15.54    |
| Storage sites | UK  | SID77  | 58.73056033 | 1.40  | 132.05   |
| Storage sites | UK  | SID78  | 61.11119113 | 1.35  | 2183.78  |
| Storage sites | UK  | SID79  | 57.98727857 | 0.96  | 193.25   |
| Storage sites | UK  | SID80  | 58.04728858 | -3.17 | 76.86    |
| Storage sites | UK  | SID81  | 59.40810414 | 1.62  | 4.56     |
| Storage sites | UK  | SID82  | 57.62933157 | 0.99  | 105.00   |
| Storage sites | UK  | SID83  | 58.24446101 | -1.71 | 1109.52  |
| Storage sites | UK  | SID84  | 58.37975968 | 0.06  | 507.60   |
| Storage sites | UK  | SID85  | 60.63316236 | 1.05  | 22.02    |
| Storage sites | UK  | SID86  | 58.32562071 | -1.92 | 4741.74  |
| Storage sites | UK  | SID87  | 58.46002611 | 0.19  | 0.00     |
| Storage sites | UK  | SID88  | 58.5480616  | -1.12 | 228.31   |
| Storage sites | UK  | SID89  | 58.11731044 | -3.07 | 88.46    |
| Storage sites | UK  | SID90  | 58.52309137 | -0.10 | 2138.84  |
| Storage sites | UK  | SID91  | 57.34975132 | 1.62  | 5265.99  |
| Storage sites | UK  | SID92  | 58.17504062 | -1.69 | 55.84    |
| Storage sites | UK  | SID93  | 57.91356974 | -0.27 | 60.83    |
| Storage sites | UK  | SID94  | 59.57640082 | 1.69  | 390.45   |
| Storage sites | UK  | SID95  | 60.87246079 | 1.70  | 254.43   |
| Storage sites | UK  | SID96  | 58.31936376 | -1.78 | 805.73   |
| Storage sites | GER | SID97  | 55.07066178 | 6.67  | 500.00** |
| Storage sites | GER | SID98  | 55.04193579 | 7.21  | 500.00** |
| Storage sites | GER | SID99  | 54.91985035 | 7.48  | 500.00** |
| Storage sites | GER | SID100 | 54.7905834  | 7.29  | 500.00** |
| Storage sites | GER | SID101 | 54.61104599 | 6.78  | 500.00** |
| Storage sites | GER | SID102 | 54.51768653 | 6.94  | 500.00** |
| Storage sites | GER | SID103 | 54.30224163 | 6.52  | 500.00** |
| Storage sites | GER | SID104 | 54.29506013 | 6.78  | 500.00** |
| Storage sites | GER | SID105 | 54.19451918 | 7.17  | 500.00** |
| Storage sites | GER | SID106 | 54.12270421 | 7.42  | 500.00** |
| Storage sites | GER | SID107 | 53.99343727 | 7.88  | 500.00** |
| Storage sites | GER | SID108 | 53.78517386 | 7.47  | 500.00** |
| Storage sites | GER | SID109 | 53.7061774  | 7.76  | 500.00** |
| Storage sites | GER | SID110 | 53.59845495 | 8.36  | 500.00** |
| Storage sites | GER | SID111 | 53.74208488 | 8.48  | 500.00** |
| Storage sites | GER | SID112 | 54.00780026 | 8.75  | 500.00** |
| Storage sites | GER | SID113 | 54.28069714 | 8.39  | 500.00** |
| Storage sites | GER | SID114 | 54.42432707 | 8.27  | 500.00** |
| Storage sites | GER | SID115 | 54.7977649  | 8.46  | 500.00** |
| Storage sites | NL  | SID116 | 52.99269476 | 4.13  | 168.00   |
| Storage sites | NL  | SID117 | 52.56102532 | 3.83  | 360.00   |
| Storage sites | NL  | SID118 | 54.37006107 | 4.46  | 650.00   |
| Storage sites | NL  | SID119 | 53.44140379 | 3.87  | 60.00    |
| Storage sites | NL  | SID120 | 55.1169628  | 4.20  | 190.00   |
| Storage sites | NL  | SID121 | 53.24260865 | 3.98  | 165.00   |
| Storage sites | NL  | SID122 | 53.75379614 | 3.27  | 140.00   |
| Storage sites | NL  | SID123 | 53.50956212 | 3.35  | 195.00   |
| Storage sites | NL  | SID124 | 53.46412323 | 4.18  | 175.00   |
| Storage sites | PT  | SID125 | 41.74543596 | -9.31 | 47.00    |
| Storage sites | PT  | SID126 | 41.70771411 | -9.11 | 82.00    |
| Storage sites | PT  | SID127 | 41.61267248 | -9.31 | 512.00   |
| Storage sites | PT  | SID128 | 41.50837801 | -9.09 | 421.00   |
| Storage sites | PT  | SID129 | 41.30790522 | -9.04 | 172.00   |
| Storage sites | PT  | SID130 | 41.45862027 | -9.13 | 166.00   |
| Storage sites | PT  | SID131 | 41.12663299 | -9.13 | 378.00   |
| Storage sites | PT  | SID132 | 41.09598137 | -8.92 | 134.00   |
| Storage sites | PT  | SID133 | 40.62447075 | -9.22 | 603.00   |
| Storage sites | PT  | SID134 | 40.51187346 | -9.04 | 240.00   |
| Storage sites | PT  | SID135 | 40.4087355  | -9.31 | 323.00   |
| Storage sites | PT  | SID136 | 40.32061279 | -9.03 | 335.00   |
| Storage sites | PT  | SID137 | 40.17655026 | -9.49 | 211.00   |



|                   |         |        |             |           |                                  |
|-------------------|---------|--------|-------------|-----------|----------------------------------|
| Storage sites     | PT      | SID138 | 40.16902891 | -9.49     | 68.00                            |
| Storage sites     | PT      | SID139 | 40.14488738 | -9.31     | 157.00                           |
| Storage sites     | PT      | SID140 | 40.03689421 | -9.19     | 10.00                            |
| Storage sites     | PT      | SID141 | 39.94828841 | -9.21     | 106.00                           |
| Storage sites     | PT      | SID142 | 39.8999413  | -9.26     | 10.00                            |
| Storage sites     | PT      | SID143 | 39.82818359 | -9.35     | 5.00                             |
| Storage sites     | PT      | SID144 | 39.71735804 | -9.30     | 1024.00                          |
| Storage sites     | PT      | SID145 | 39.62591193 | -8.97     | 182.00                           |
| Storage sites     | PT      | SID146 | 39.39648525 | -9.02     | 27.00                            |
| Storage sites     | PT      | SID147 | 38.34034365 | -8.95     | 29.00                            |
| Storage sites     | PT      | SID148 | 38.27197658 | -8.83     | 15.00                            |
| Storage sites     | PT      | SID149 | 38.20444252 | -8.95     | 19.00                            |
| Storage sites     | PT      | SID150 | 38.13253649 | -9.03     | 22.00                            |
| Storage sites     | PT      | SID151 | 36.78875451 | -8.40     | 183.00                           |
| Storage sites     | PT      | SID152 | 36.78875451 | -8.40     | 662.00                           |
| Storage sites     | PT      | SID153 | 36.79973559 | -7.73     | 86.00                            |
| Storage sites     | PT      | SID154 | 36.90185608 | -7.57     | 38.00                            |
| Storage sites     | PT      | SID155 | 36.7747261  | -7.32     | 210.00                           |
| Storage sites     | PT      | SID156 | 36.55563772 | -7.43     | 68.00                            |
| Type              | Country | VID    | Latitude    | Longitude |                                  |
| Terminal          | GER     | TID4   | 53.556378   | 8.16      |                                  |
| Terminal          | NL      | TID8   | 51.98936213 | 4.16      |                                  |
| Terminal          | UK      | TID12  | 57.55512209 | -1.84     |                                  |
| Terminal          | UK      | TID16  | 53.19136044 | -3.06     |                                  |
| Terminal          | UK      | TID21  | 53.26012071 | 0.28      |                                  |
| Terminal          | UK      | TID22  | 53.68945314 | 0.04      |                                  |
| Terminal          | IR      | TID25  | 54.82315909 | -5.76     |                                  |
| Terminal          | IR      | TID26  | 53.63410951 | -6.24     |                                  |
| Terminal          | PT      | TID29  | 41.13424079 | -8.66     |                                  |
| Terminal          | PT      | TID30  | 42.22657922 | -8.73     |                                  |
| Terminal          | PT      | TID31  | 38.65399112 | -9.23     |                                  |
| Terminal          | PT      | TID32  | 37.13771839 | -6.84     |                                  |
| Terminal          | PT      | TID33  | 37.0911769  | -8.67     |                                  |
| Terminal          | PT      | TID34  | 36.59514261 | -6.26     |                                  |
| Type              | Country | VID    | Latitude    | Longitude | Name of site                     |
| Olivine           | NOR     | OID1   | 62.004513   | 5.85      | Steinsvick                       |
| Olivine           | ESP     | OID2   | 43.73912    | -7.87     | Spasek Minerals                  |
| Olivine           | IT      | OID3   | 45.420761   | 7.75      | Nuova Cives S.R.L                |
| Olivine           | GR      | OID4   | 40.31253    | 23.39     | Thermolith S.A.                  |
| Olivine           | GR      | OID5   | 40.318072   | 23.40     | Grecian Magnesite S.A.           |
| Olivine           | TUR     | OID6   | 37.739251   | 29.09     | Geomin Madencilik San ve Tic Ltd |
| Type              |         | VID    | Latitude    | Longitude | Description                      |
| Kaolinite deposit |         | CLID1  | 47.88896359 | 19.20     | Felsopeteny (Hungary)            |
| Kaolinite deposit |         | CLID2  | 47.92295888 | 19.26     | Romhany (Hungary)                |
| Kaolinite deposit |         | CLID3  | 48.65259777 | 18.91     | Bartosova Lehotka (Slovakia)     |
| Kaolinite deposit |         | CLID4  | 48.3654678  | 19.60     | Haliccka (Slovakia)              |
| Kaolinite deposit |         | CLID5  | 48.42309979 | 19.73     | Breznicka (Slovakia)             |
| Kaolinite deposit |         | CLID6  | 48.72601481 | 21.86     | Pozdisovce (Slovakia)            |
| Kaolinite deposit |         | CLID7  | 50.24421547 | 21.78     | Kolbuszowa (Poland)              |
| Kaolinite deposit |         | CLID8  | 50.17472142 | 20.99     | Dabrowa Tarnowska (Poland)       |
| Kaolinite deposit |         | CLID9  | 50.7802922  | 17.16     | Wyzonowice (Poland)              |
| Kaolinite deposit |         | CLID10 | 50.94088791 | 16.49     | Zarow (Poland)                   |
| Kaolinite deposit |         | CLID11 | 51.2301887  | 15.39     | Zebrzydowa (Poland)              |
| Kaolinite deposit |         | CLID12 | 51.254947   | 15.22     | Czerwona Woda (Poland)           |
| Kaolinite deposit |         | CLID13 | 48.85589875 | 16.05     | Znaim (Czech Republic)           |
| Kaolinite deposit |         | CLID14 | 48.30894796 | 14.62     | Kriechbaum (Austria)             |
| Kaolinite deposit |         | CLID15 | 50.23425202 | 12.87     | Karlsbad (Czech Republic)        |
| Kaolinite deposit |         | CLID16 | 49.83993915 | 13.36     | Horni Briza (Czech Republic)     |

|                   |        |             |       |                                                         |
|-------------------|--------|-------------|-------|---------------------------------------------------------|
| Kaolinite deposit | CLID17 | 49.88209993 | 12.33 | Tirschenreuth (Germany)                                 |
| Kaolinite deposit | CLID18 | 51.27575883 | 14.10 | Kamenz (Germany)                                        |
| Kaolinite deposit | CLID19 | 50.23381122 | 11.33 | Kronach (Germany)                                       |
| Kaolinite deposit | CLID20 | 51.22761392 | 12.99 | Kemmlitz (Germany)                                      |
| Kaolinite deposit | CLID21 | 51.39328755 | 11.98 | Merseburg (Germany)                                     |
| Kaolinite deposit | CLID22 | 51.17641883 | 11.80 | Saale (Germany)                                         |
| Kaolinite deposit | CLID23 | 55.10113359 | 14.71 | Rønne (Denmark)                                         |
| Kaolinite deposit | CLID24 | 50.61131736 | 7.21  | Oberwinter (Germany)                                    |
| Kaolinite deposit | CLID25 | 50.00150758 | 5.02  | Haut-Fays(Beglium)                                      |
| Kaolinite deposit | CLID26 | 49.58795719 | 7.14  | Nohfelden (Germany)                                     |
| Kaolinite deposit | CLID27 | 49.986148   | 7.97  | Geisenheim (Germany)                                    |
| Kaolinite deposit | CLID28 | 45.10051816 | 4.87  | Larnage (France)                                        |
| Kaolinite deposit | CLID29 | 50.551808   | -3.61 | Kingsteignton, NEWTON ABBOT, Devon (UK)                 |
| Kaolinite deposit | CLID30 | 50.579888   | -3.63 | Chudleigh Knighton, NEWTON ABBOT, Devon (UK)            |
| Kaolinite deposit | CLID31 | 50.58286    | -3.64 | Chudleigh Knighton, NEWTON ABBOT, Devon (UK)            |
| Kaolinite deposit | CLID32 | 50.885728   | -4.11 | TORRINGTON, Devon (UK)                                  |
| Kaolinite deposit | CLID33 | 50.556344   | -3.61 | Chudleigh Road, Kingsteignton, NEWTON ABBOT, Devon (UK) |
| Kaolinite deposit | CLID34 | 50.562782   | -3.61 | Chudleigh Road, Kingsteignton, NEWTON ABBOT, Devon (UK) |
| Kaolinite deposit | CLID35 | 50.575948   | -3.63 | Kingsteignton, NEWTON ABBOT, Devon (UK)                 |
| Kaolinite deposit | CLID36 | 50.887367   | -4.11 | TORRINGTON, Devon (UK)                                  |
| Kaolinite deposit | CLID37 | 50.567934   | -3.62 | Kingsteignton, NEWTON ABBOT, Devon (UK)                 |
| Kaolinite deposit | CLID38 | 50.552935   | -3.63 | Teignrace, Kingsteignton, NEWTON ABBOT, Devon (UK)      |
| Kaolinite deposit | CLID39 | 50.889194   | -4.12 | TORRINGTON, Devon (UK)                                  |
| Kaolinite deposit | CLID40 | 50.645981   | -2.10 | WAREHAM, Dorset (UK)                                    |
| Kaolinite deposit | CLID41 | 50.364569   | -4.13 | Coxside, PLYMOUTH, Devon (UK)                           |
| Kaolinite deposit | CLID42 | 50.573448   | -3.63 | Heathfield, NEWTON ABBOT, Devon (UK)                    |
| Kaolinite deposit | CLID43 | 50.642542   | -2.15 | Povington, WAREHAM, Dorset (UK)                         |
| Kaolinite deposit | CLID44 | 50.581467   | -3.63 | Chudleigh Knighton, NEWTON ABBOT, Devon (UK)            |
| Kaolinite deposit | CLID45 | 50.570072   | -3.61 | Chudleigh Road, Kingsteignton, NEWTON ABBOT, Devon (UK) |
| Kaolinite deposit | CLID46 | 50.650407   | -2.11 | Furzebrook, WAREHAM, Dorset (UK)                        |
| Kaolinite deposit | CLID47 | 50.544147   | -3.64 | Kingsteignton, NEWTON ABBOT, Devon (UK)                 |
| Kaolinite deposit | CLID48 | 50.708544   | -2.15 | WAREHAM, Dorset (UK)                                    |
| Kaolinite deposit | CLID49 | 43.650291   | -7.38 | Burela kaolin deposit (Spain)                           |

## SUPPLEMENTARY REFERENCES

1. J. Rowland, *Cement Products*, 2023.
2. E. Mokrzycki and A. Uliasz-Bocheńczyk, *Applied Energy*, 2003, **74**, 95-100.
3. The European Cement Association, *Cementing the European Green Deal*, The European Cement Association,, Brussels, 2020.
4. R. T. Kusuma, R. B. Hiremath, P. Rajesh, B. Kumar and S. Renukappa, *Renewable and Sustainable Energy Reviews*, 2022, **163**, 112503.
5. D. Thrän, D. Peetz, K. Schaubach, S. Backéus, L. Benedetti and L. Bruce, *Global wood pellet industry and trade study 2017*, IEA Bioenergy Task 40, 2017.
6. M. Voldsund, R. Anantharaman, D. Berstad, C. Fu, S. Gardarsdottir, A. Jamali, J. Perez-Caivo, M. Romano, S. Roussanaly and J. Ruppert, *H2020 Project: CO2 Capture from Cement Production*, 2018.
7. J. Kjärstad, J. Morbee, M. Odenberger, F. Johnsson and E. Tzimas, *Energy Procedia*, 2013, **37**, 2941-2948.
8. Zero Emission Platform, *Business models for commercial CO2 transport and storage*, European Technology Platform for Zero Emission Fossil Fuel Power Plants, 2014.
9. B. Metz, O. Davidson, H. De Coninck, M. Loos and L. Meyer, *IPCC special report on carbon dioxide capture and storage*, Cambridge: Cambridge University Press, 2005.
10. Zero Emission Platform, *The Costs of CO2 Transport - Post-demonstration CCS in the EU*, European Technology Platform for Zero Emission Fossil Fuel Power Plants, Brussels, 2011.
11. C. Merk, Å. D. Nordø, G. Andersen, O. M. Lægneid and E. Tvinnerheim, *Energy Research & Social Science*, 2022, **87**, 102450.
12. H. Geerlings and R. Zevenhoven, *Annu Rev Chem Biomol Eng*, 2013, **4**, 103-117.
13. A. Sanna, M. Uibu, G. Caramanna, R. Kuusik and M. M. Maroto-Valer, *Chem Soc Rev*, 2014, **43**, 8049-8080.
14. F.-E. Digulla and S. Bringezu, *Energies*, 2023, **16**, 4118.
15. P. Renforth, *Nature Communications*, 2019, **10**, 1401.
16. X. Wang and M. M. Maroto-Valer, *Energy*, 2013, **51**, 431-438.
17. S. J. Gerdemann, W. K. O'Connor, D. C. Dahlin, L. R. Penner and H. Rush, *Environmental science & technology*, 2007, **41**, 2587-2593.
18. D. Kremer, S. Etzold, J. Boldt, P. Blaum, K. M. Hahn, H. Wotruba and R. Telle, *Minerals*, 2019, **9**.
19. T. Strunge, P. Renforth and M. Van der Spek, *Communications Earth & Environment*, 2022, DOI: <https://doi.org/10.1038/s43247-022-00390-0>.
20. E. Benhelal, M. Rashid, C. Holt, M. Rayson, G. Brent, J. Hook, M. Stockenhuber and E. Kennedy, *Journal of Cleaner Production*, 2018, **186**, 499-513.
21. S. Stopic, C. Dertmann, I. Koiwa, D. Kremer, H. Wotruba, S. Etzold, R. Telle, P. Knops and B. Friedrich, *Metals*, 2019, **9**, 708.
22. H. S. Wong and H. Abdul Razak, *Cement and Concrete Research*, 2005, **35**, 696-702.
23. European standard, *EN 197-1:2000: Cement. Composition, specifications and conformity criteria for common cements*, British Standards Institute, 2000.
24. D. Kremer, T. Strunge, J. Skocek, S. Schabel, M. Kostka, C. Hopmann and H. Wotruba, *Journal of CO2 Utilization*, 2022, **62**, 102067.
25. E. Eikeland, A. B. Blichfeld, C. Tyrsted, A. Jensen and B. B. Iversen, *ACS applied materials & interfaces*, 2015, **7**, 5258-5264.
26. H. Ostovari, A. Sternberg and A. Bardow, *Sustainable Energy & Fuels*, 2020, DOI: 10.1039/D0SE00190B.
27. D. Kremer and H. Wotruba, *Minerals*, 2020, **10**, 1098.
28. S. Sánchez Berriel, A. Favier, E. Rosa Domínguez, I. R. Sánchez Machado, U. Heierli, K. Scrivener, F. Martirena Hernández and G. Habert, *Journal of cleaner production*, 2016, **124**, 361-369.
29. D. Damidot, B. Lothenbach, D. Herfort and F. P. Glasser, *Cement and Concrete Research*, 2011, **41**, 679-695.
30. B. Lothenbach, K. Scrivener and R. Hooton, *Cement and concrete research*, 2011, **41**, 1244-1256.
31. M. Antoni, J. Rossen, F. Martirena and K. Scrivener, *Cement and Concrete Research*, 2012, **42**, 1579-1589.
32. S. C. Taylor-Lange, E. L. Lamon, K. A. Riding and M. C. G. Juenger, *Applied Clay Science*, 2015, **108**, 84-93.
33. Y. Cancio Diaz, S. Sánchez Berriel, U. Heierli, A. R. Favier, I. R. Sánchez Machado, K. L. Scrivener, J. F. Martirena Hernández and G. Habert, *Development Engineering*, 2017, **2**, 82-91.
34. A. Bergman and A. Rinberg, *CDR Primer*, 2021.
35. J. Fuhrman, H. McJeon, P. Patel, S. C. Doney, W. M. Shobe and A. F. Clarens, *Nature Climate Change*, 2020, **10**, 920-927.
36. T. Langhorst, S. McCord, A. Zimmermann, L. Müller, L. Cremonese, T. Strunge, Y. Wang, A. V. Zaragoza, J. Wunderlich, A. Marxen, K. Armstrong, G. Buchner, A. Kätelhön, M. Bachmann, A. Sternberg, S. Michailos, H. Naims, B. Winter, D. Roskosch, G. Faber, C. Mangin, B. Olfe-Kräutlein, P. Styring, R. Schomäcker, A. Bardow and V. Sick, *Techno-economic assessment & life cycle assessment guidelines for CO2 Utilization (Version 2.0)*, Global CO2 Initiative, 2022.
37. J. Young, N. McQueen, C. Charalambous, S. Foteinis, O. Hawrot, M. Ojeda, H. Pilorgé, J. Andresen, P. Psarras and P. Renforth, *One Earth*, 2023, **6**, 899-917.
38. M. Fasihi, O. Efimova and C. Breyer, *Journal of Cleaner Production*, 2019, **224**, 957-980.
39. European Commission - Joint Research Centre, *Journal*, 2013.
40. S. Knopf and F. May, *Energy Procedia*, 2017, **114**, 4710-4721.
41. S. Höller and P. Viebahn, *Energy Procedia*, 2011, **4**, 4897-4904.
42. F. Neele, C. Hofstee, R. Arts, V. Vandeweyer, M. Nepveu, J. ten Veen and F. Wilschut, *Energy Procedia*, 2013, **37**, 5220-5229.
43. European Commission, PCI Transparency platform - Projects of common interest., [https://ec.europa.eu/energy/infrastructure/transparency\\_platform/map-viewer/main.html](https://ec.europa.eu/energy/infrastructure/transparency_platform/map-viewer/main.html), (accessed 01.08.2022, 2022).
44. H. G. Dill, *Ore Geology Reviews*, 2020, **119**, 103304.
45. E. Galán, P. Aparicio, J. C. Fernández-Caliani, A. Miras, M. G. Márquez, A. E. Fallick and N. Clauer, *Applied Clay Science*, 2016, **131**, 14-26.
46. British Geological Survey, *Journal*, 2022.

47. H. Ostovari, L. Müller, F. Mayer and A. Bardow, *Journal of Cleaner Production*, 2022, **360**, 131750.
48. Mapcruzin, OpenStreetMaps Shapefile European Railways, <https://mapcruzin.com/free-europe-arcgis-maps-shapefiles.htm>, 2022).
49. B. Halpern, M. Frazier, J. Potapenko, K. Casey, K. Koenig, C. Longo, J. Lowndes, C. Rockwood, E. Selig and K. Selkoe, *Knowledge Network for Biocomplexity*. doi, 2015, **10**, F15180F.
50. A. Novikov, *Towards Data Sci*, 2019.
51. T. Strunge, L. Küng, P. Renforth and M. Van der Spek, presented in part at the Proceedings of the 16th Greenhouse Gas Control Technologies Conference (GHGT-16) 23-24 Oct 2022., Lyon, 2022.
52. World Energy Council (WEC), *World Energy Resources, 2013 Survey*, World Energy Council (WEC), London, 2013.
53. Statista, Cement production volume in European countries 2020, <https://www.statista.com/statistics/1291068/european-cement-production-volume-by-country/>, (accessed 08.08.2020, 2020).
54. R. Anantharaman, D. Berstad, G. Cinti, E. De Lena, M. Gatti, H. Hoppe, I. Martinez, J. G. M.-S. Monterio, M. Romano, S. Roussanaly, E. Schols, M. Spinelli, S. O. Størset, Peter and M. Voldsund, *CEMCAAP Framework for Comparative Techno-economic Analysis of CO2 Capture From Cement Plants-D3. 2*, Zenodo, 2018.
55. C. Telmo and J. Lousada, *Biomass and Bioenergy*, 2011, **35**, 2634-2639.
56. W. Zieri and I. Ismail, in *Handbook of Ecomaterials*, eds. L. M. T. Martínez, O. V. Kharissova and B. I. Kharisov, Springer International Publishing, Cham, 2019, DOI: 10.1007/978-3-319-68255-6\_142, pp. 1183-1206.
57. A. Favier, C. De Wolf, K. Scrivener and G. Habert, *A sustainable future for the European Cement and Concrete Industry: Technology assessment for full decarbonisation of the industry by 2050*, ETH Zurich, 2018.
58. C. Bataille, 2020, DOI: <https://doi.org/10.1787/5ccf8e33-en>.
59. T. Czigler, S. Reiter, P. Schulze and K. Somers, *Laying the foundation for zero-carbon cement*, McKinsey & Company, 2020.
60. S. P. Deolalkar, in *Designing Green Cement Plants*, ed. S. P. Deolalkar, Butterworth-Heinemann, 2016, DOI: <https://doi.org/10.1016/B978-0-12-803420-0.00011-1>, pp. 83-86.
61. L.-A. Tokheim, A. Mathisen, L. E. Øi, C. K. Jayarathna, N. H. Eldrup and T. Gautestad, 2019.
62. V. W. Y. Tam, M. Soomro and A. C. J. Evangelista, *Construction and Building Materials*, 2018, **172**, 272-292.
63. A. A. Shubbar, M. Sadique, P. Kot and W. Atherton, *Construction and Building Materials*, 2019, **210**, 172-187.
64. R. Maddalena, J. J. Roberts and A. Hamilton, *Journal of Cleaner Production*, 2018, **186**, 933-942.
65. E. Gartner and T. Sui, *Cement and concrete research*, 2018, **114**, 27-39.
66. K. L. Scrivener, V. M. John and E. M. Gartner, 2016.
67. E. Bellmann and P. Zimmermann, *Climate protection in the concrete and cement industry - Background and possible courses of action*, Berlin, 2019.
68. Y. Shao, *Beneficial Use of Carbon Dioxide in Precast Concrete Production*, ; McGill Univ., Montreal, QC (Canada), 2014.
69. B. D'Amico, F. Pomponi and J. Hart, *Journal of Cleaner Production*, 2021, **279**, 123487.
70. ArgusMedia, Argus Biomass markets - Weekly news and analysis, <https://www.argusmedia.com/-/media/Files/sample-reports/argus-biomass-markets.ashx?la=en%26hash=872E2C03A0A78FE3F236BBF00E7729E3114326E0>, (accessed 04.01.23, 2023).
71. US Geological Survey, *Average price of kaolin in the U.S. from 2010 to 2022 (in U.S. dollars per ton)*, Statista, Statista, 2023.
72. T. J. Brown, J. S. Coggan, D. J. Evans, P. J. Foster, J. Hewitt, J. B. Kruyswijk, N. Smith and E. J. Steadman, 2010.
73. H. Béarat, M. J. McKelvy, A. V. Chizmeshya, D. Gormley, R. Nunez, R. Carpenter, K. Squires and G. H. Wolf, *Environmental science & technology*, 2006, **40**, 4802-4808.
74. W. J. Huijgen, R. N. Comans and G.-J. Witkamp, *Energy Conversion and Management*, 2007, **48**, 1923-1935.
75. European Commission, *Communication from the commission to the European Parliament, the Council, the European Economic and Social Committee and the Committee of the regions - Energy prices and costs in Europe (COM (2019) 1 final)*, Brussels, 2019.
76. N. Duić, N. Štefanić, Z. Lulić, G. Krajačić, T. Pukšec and T. Novosel, *Heat Roadmap Europe: EU28 fuel prices for 2015, 2030 and 2050 - Deliverable 6.1: Future fuel price review*, University of Zagreb, Zagreb, 2017.
77. EIA, *Projection of coal and natural gas prices from 2016 to 2050 (in U.S. dollars per million British thermal units)*, Statista, Statista, 2017.
78. N. Tkachenko, K. Tang, M. McCarten, S. Reece, D. Kampmann, C. Hickey, M. Bayaraa, P. Foster, C. Layman, C. Rossi, K. Scott, D. Yoken, C. Christiaen and B. Caldecott, *Scientific Data*, 2023, **10**, 696.
79. C. Bellora and L. Fontagné, *Energy Economics*, 2023, **123**, 106673.
80. A. Dillon, N. Burnett and I. Jozepa, *Carbon Border Adjustment Mechanism*, House of Commons Library, 2024.
81. European Central Bank, Cost of borrowing for corporations - Euro area, <https://sdw.ecb.europa.eu/browseSelection.do?type=series&q=MIR.M.U2.B.L22.A.R.A.2240.EUR.N+MIR.M.U2.B.A2I.AM.R.A.2240.EUR.N&node=SEARCHRESULTS>, (accessed 01.03.2021, 2021).
82. Gurufocus, ROE % Sector Distribution, <https://www.gurufocus.com/term/ROE/OTCPK:HDELY/ROE-Percentage/HeidelbergCement%20AG>, (accessed 01.02.2021, 2021).
83. Macrotrends, Holcim Debt to Equity Ratio 2010-2020, <https://www.macrotrends.net/stocks/charts/HCMLY/holcim/debt-equity-ratio>, (accessed 01.02.2021, 2021).
84. Macrotrends, HeidelbergCement AG Debt to Equity Ratio 2008-2020, <https://www.macrotrends.net/stocks/charts/HDELY/heidelbergcement-ag/debt-equity-ratio>, (accessed 01.02.2021, 2021).
85. Alibaba, Product search at Alibaba.com, <https://www.alibaba.com/>.
86. EPRI, *Electric Power Research Institute, Palo Alto, California*, 1993.
87. AACE, *Cost estimate classification system - as applied in engineering, procurement, and construction for the process industries, AACE International Recommended Practice No. 18R-97 (Rev. November 29, 2011)*. Morgantown, WV, 2011.
88. C. Grande, S. Roussanaly, R. Anantharaman and K. Lindqvist, *IEAGHG*, editor, 2016.
89. E. S. Rubin, I. M. Azevedo, P. Jaramillo and S. Yeh, *Energy Policy*, 2015, **86**, 198-218.
90. C. Greig, A. Garnett, J. Oesch and S. Smart, *Univ. Queensl., Brisbane*, 2014.
91. N. Von Der Assen, P. Voll, M. Peters and A. Bardow, *Chemical Society Reviews*, 2014, **43**, 7982-7994.
92. M. Pehnt and J. Henkel, *International Journal of Greenhouse Gas Control*, 2009, **3**, 49-66.

93. S. Gabi, *Sphera: Stuttgart, Echterdingen, Germany*, 2019.
94. H. N. Psaraftis and C. A. Kontovas, *WMU Journal of Maritime Affairs*, 2009, **8**, 1-25.
95. Swiss Centre for Life Cycle Inventories, 2019.
96. J. Young, N. McQueen, C. Charalambous, S. Foteinis, O. Hawrot, M. Ojeda, H. Pilorgé, J. Andresen, P. Psarras and P. Renforth, 2022.
97. N. Sunny, N. Mac Dowell and N. Shah, *Energy & Environmental Science*, 2020, **13**, 4204-4224.
98. I. Walker, B. Madden and F. Tahir, *Element Energy Ltd.: Cambridge, UK*, 2018.
